# Supplementary material for: Genetics Responses to Hypoxia and Reoxygenation Stress in Larimichthys crocea Revealed via Transcriptome Analysis and Weighted Gene Co-Expression Network
Source: MDPI journal article supplement (doi:10.3390/ani11113021), 2021-10-20
Supplement: s1 [file s1]

**Table S1.** Summary of the Illumina sequencing and mapping statistics of the 18 transcriptome samples.

| Sample name | Clean reads | Clean bases (Gb) | GC-Content (%) | Q20 (%) | Q30 (%) | Total mapped (%) | Uniquely mapped (%) |
|-------------|-------------|------------------|----------------|---------|---------|------------------|---------------------|
| Bl-0h       | 60,502,530  | 9.04             | 48.55          | 97.42   | 93.41   | 85.63            | 61.41               |
| Bl-6h       | 50,833,126  | 7.06             | 48.96          | 96.40   | 91.72   | 83.86            | 63.67               |
| Bl-24h      | 42,253,312  | 6.32             | 48.32          | 96.55   | 92.01   | 83.71            | 68.21               |
| Bl-48h      | 77,754,614  | 11.63            | 48.94          | 98.24   | 95.03   | 85.23            | 70.30               |
| Bl-96h      | 58,742,354  | 8.77             | 48.11          | 97.90   | 94.51   | 84.41            | 72.00               |
| Bl-120h     | 79,925,490  | 11.94            | 49.86          | 97.40   | 93.52   | 78.45            | 68.55               |
| Gi-0h       | 45,659,176  | 6.59             | 44.45          | 95.93   | 91.00   | 80.23            | 73.30               |
| Gi-6h       | 47,924,830  | 7.70             | 43.78          | 95.92   | 91.01   | 80.20            | 73.61               |
| Gi-24h      | 44,323,268  | 6.69             | 44.65          | 96.26   | 91.63   | 80.50            | 73.80               |
| Gi-48h      | 50,169,538  | 7.51             | 50.70          | 98.16   | 94.78   | 86.00            | 77.93               |
| Gi-96h      | 41,228,374  | 6.16             | 49.21          | 97.05   | 93.08   | 76.35            | 69.87               |
| Gi-120h     | 57,811,174  | 8.65             | 50.11          | 97.78   | 93.95   | 85.29            | 78.05               |
| Li-0h       | 46,205,750  | 6.90             | 47.42          | 96.24   | 91.47   | 85.44            | 78.39               |
| Li-6h       | 50,003,174  | 7.45             | 47.14          | 96.16   | 91.34   | 84.10            | 77.38               |
| Li-24h      | 46,838,274  | 6.97             | 45.60          | 96.24   | 91.53   | 85.08            | 78.37               |
| Li-48h      | 47,288,278  | 7.08             | 50.73          | 98.25   | 95.15   | 86.19            | 78.66               |
| Li-96h      | 59,428,234  | 8.89             | 50.55          | 98.36   | 95.43   | 83.38            | 76.05               |
| Li-120h     | 47,411,722  | 7.09             | 50.57          | 98.26   | 95.16   | 86.76            | 79.28               |
| Total       | 956,902,216 | 142.97           |                |         |         |                  |                     |
