# Supplementary figures and images for: Genetics Responses to Hypoxia and Reoxygenation Stress in Larimichthys crocea Revealed via Transcriptome Analysis and Weighted Gene Co-Expression Network
Source: MDPI journal article supplement (doi:10.3390/ani11113021), 2021-10-20

A

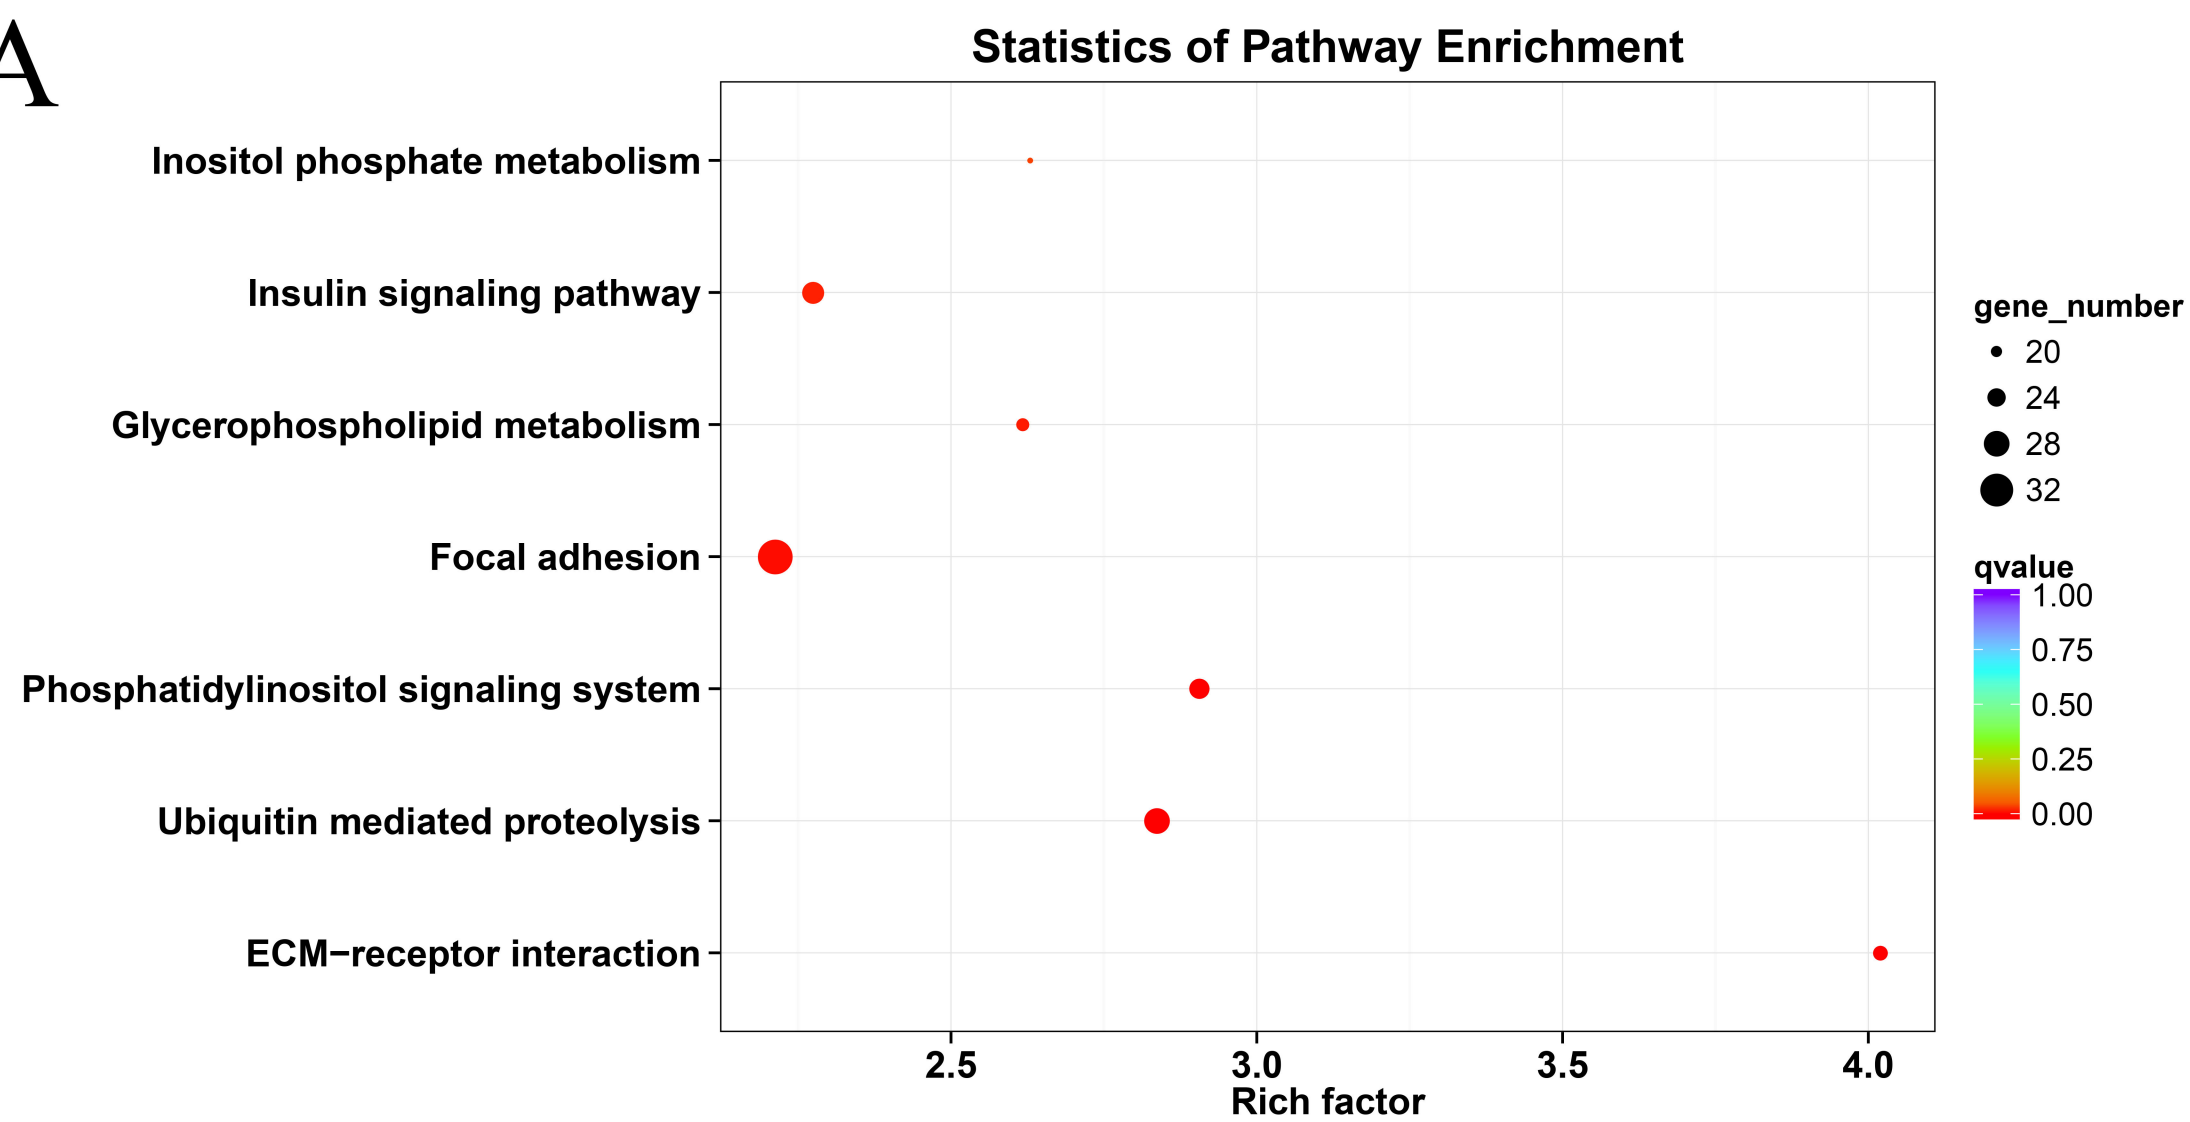

B

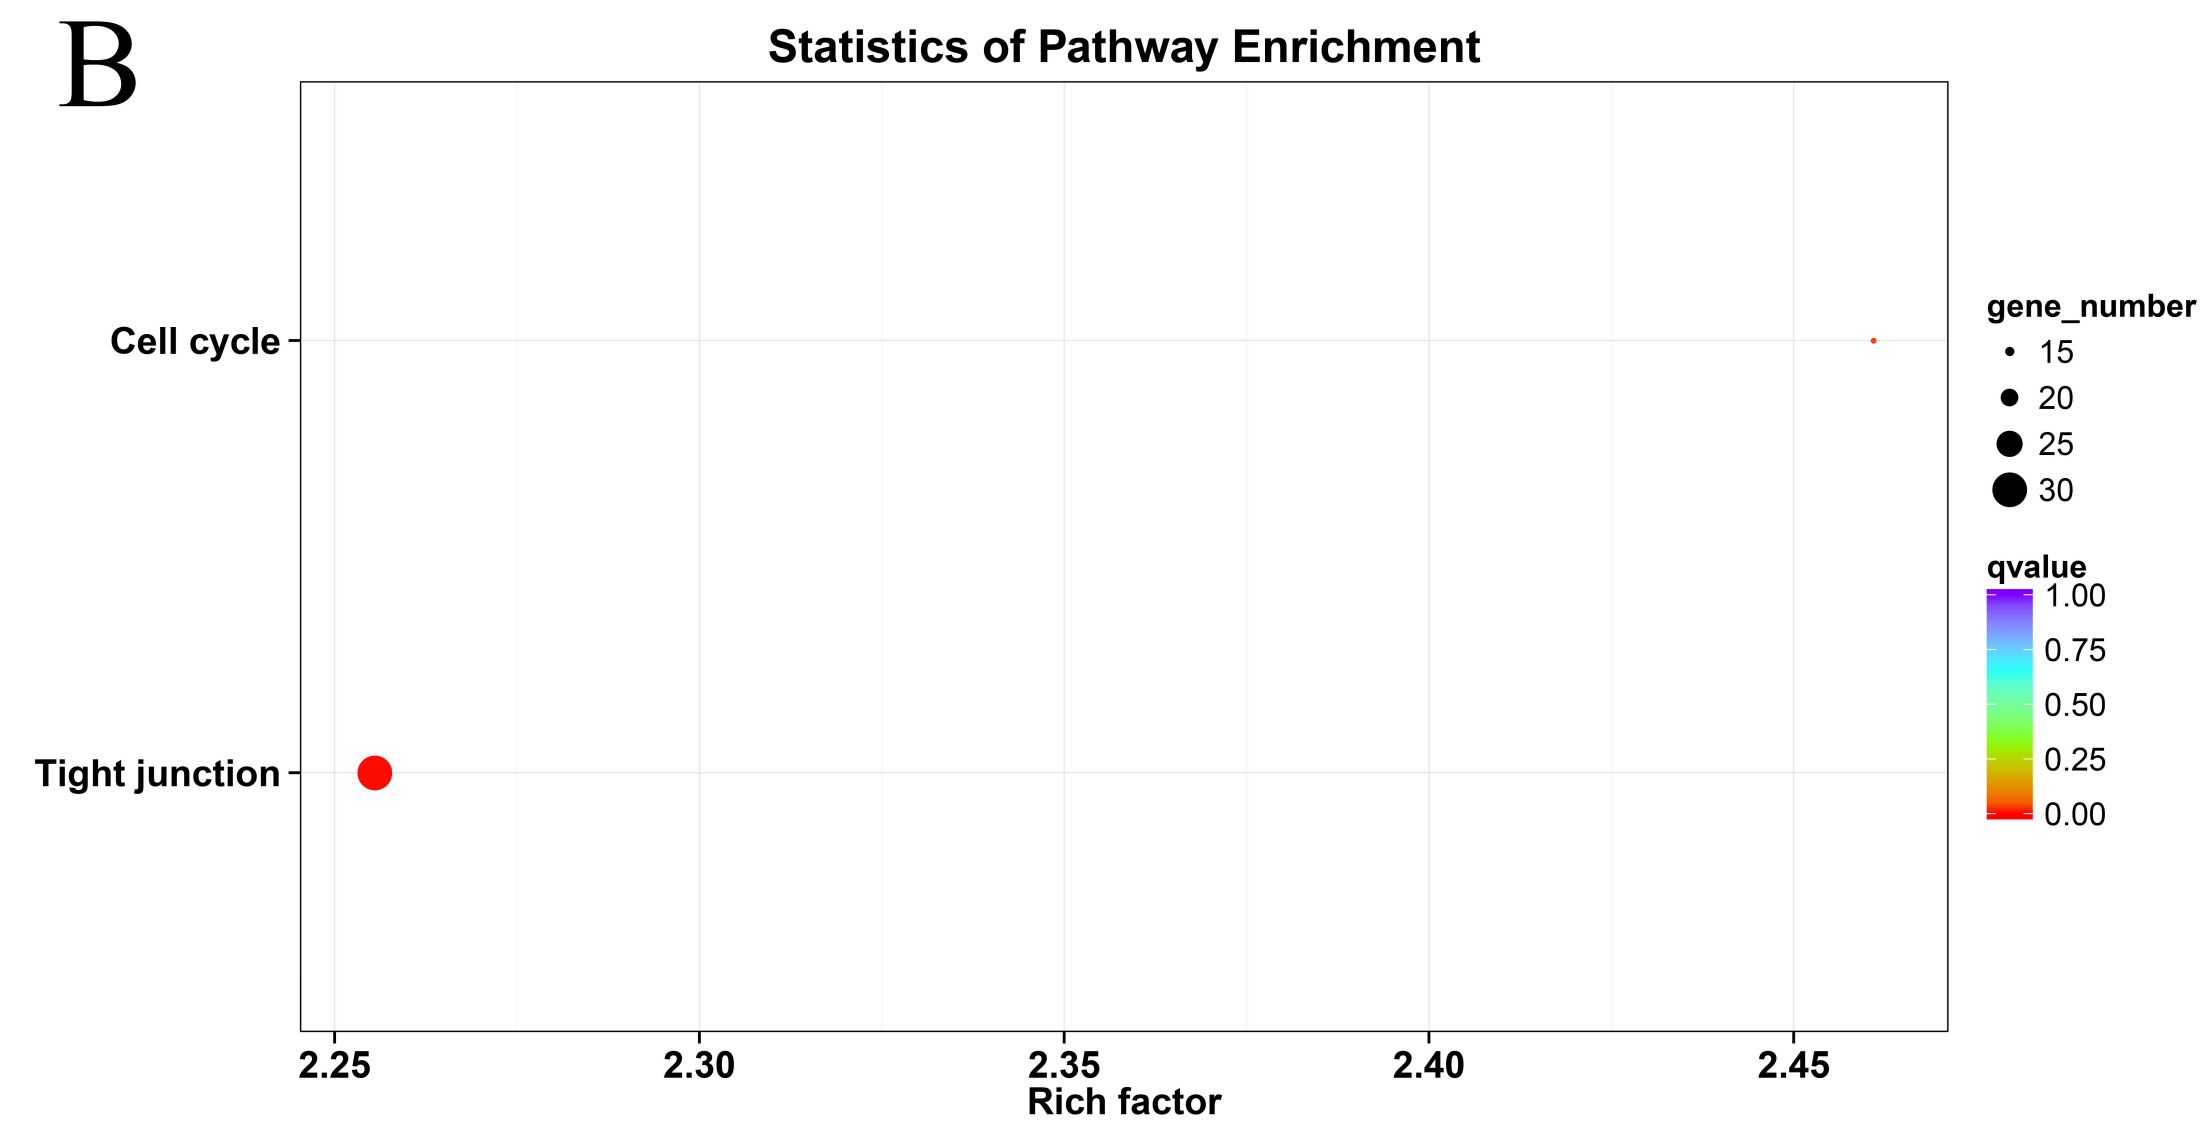

C

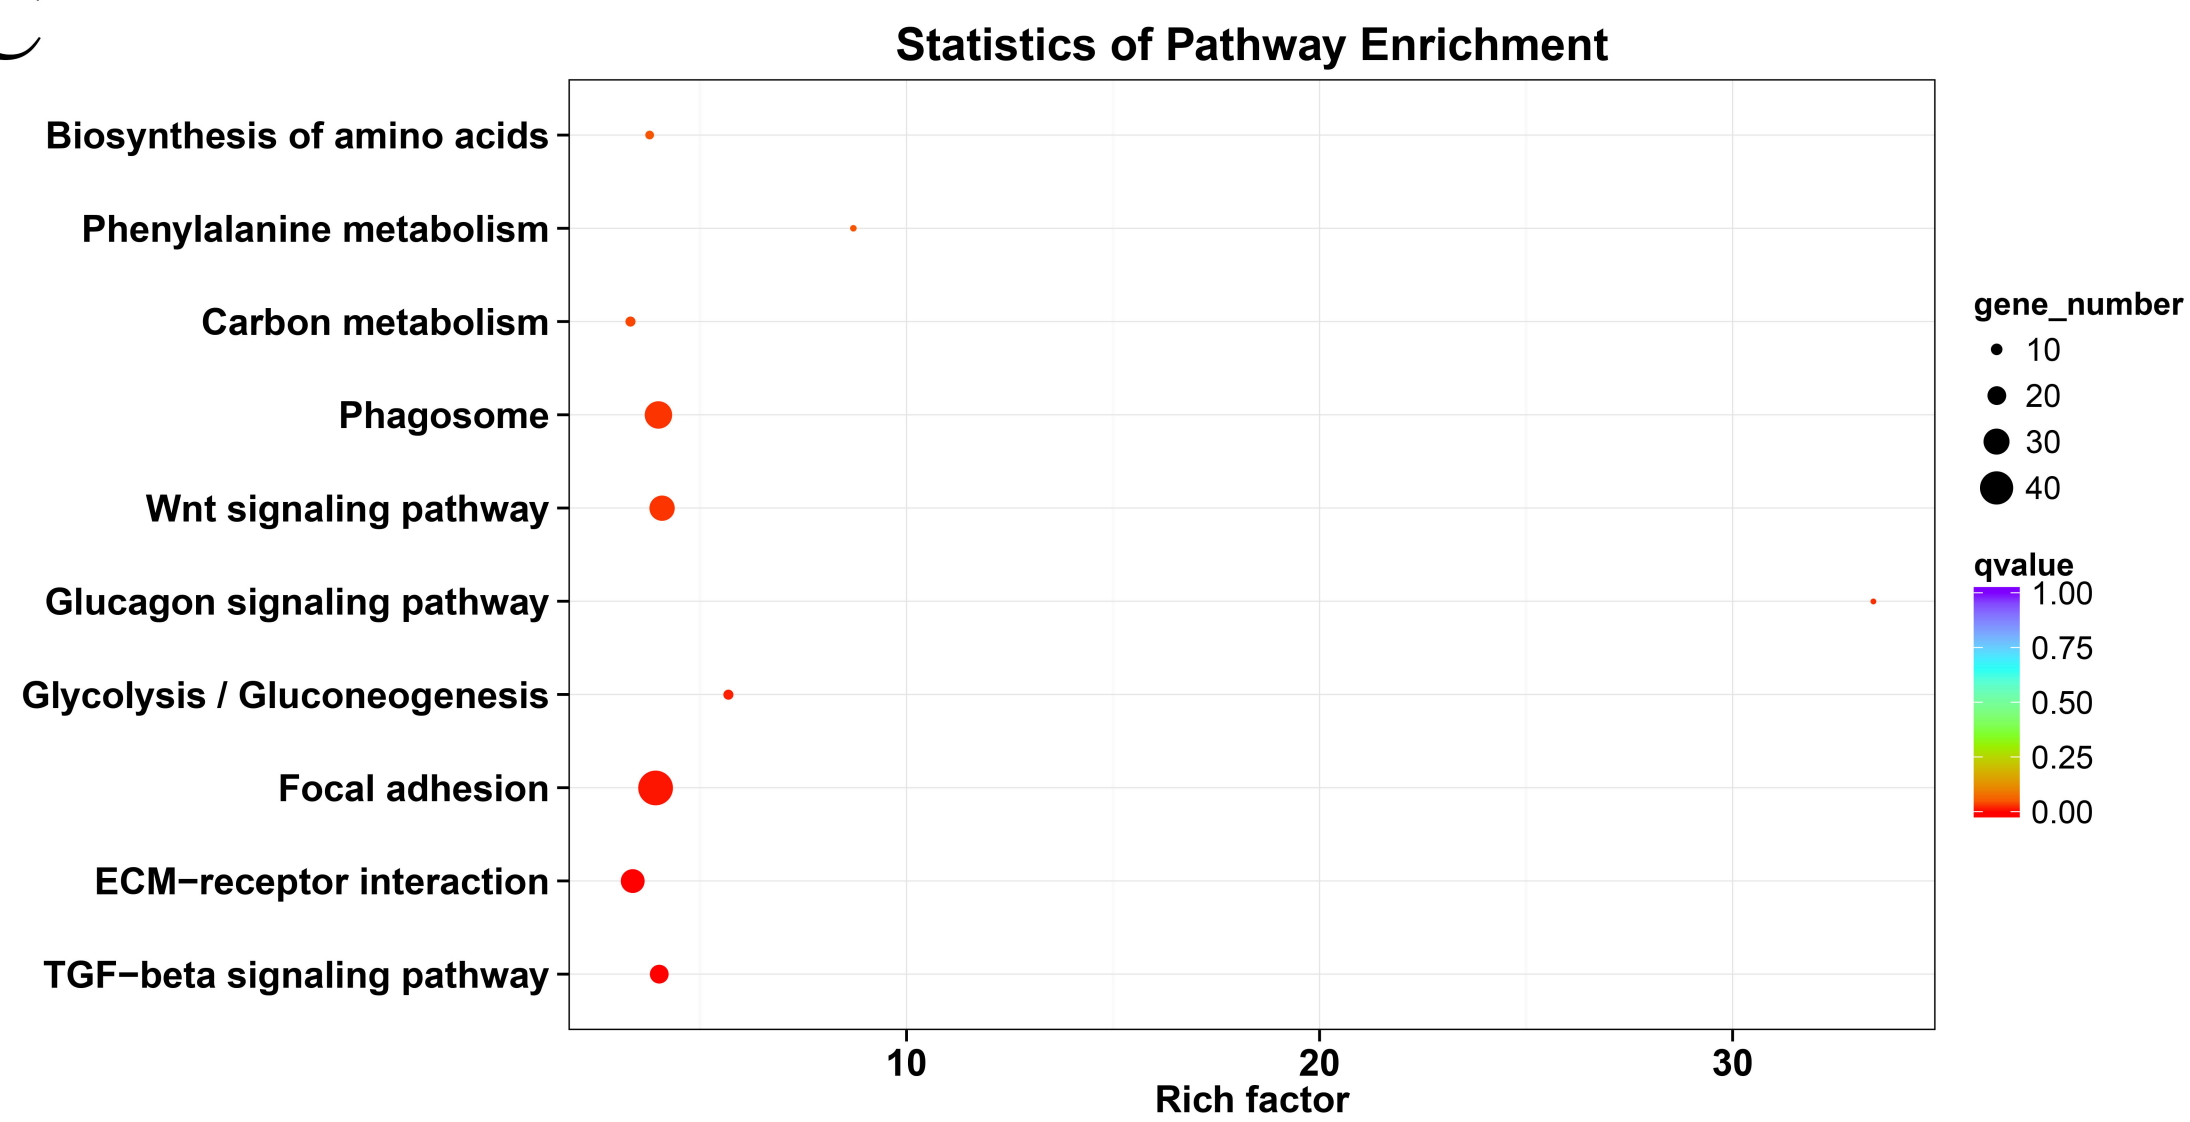

D

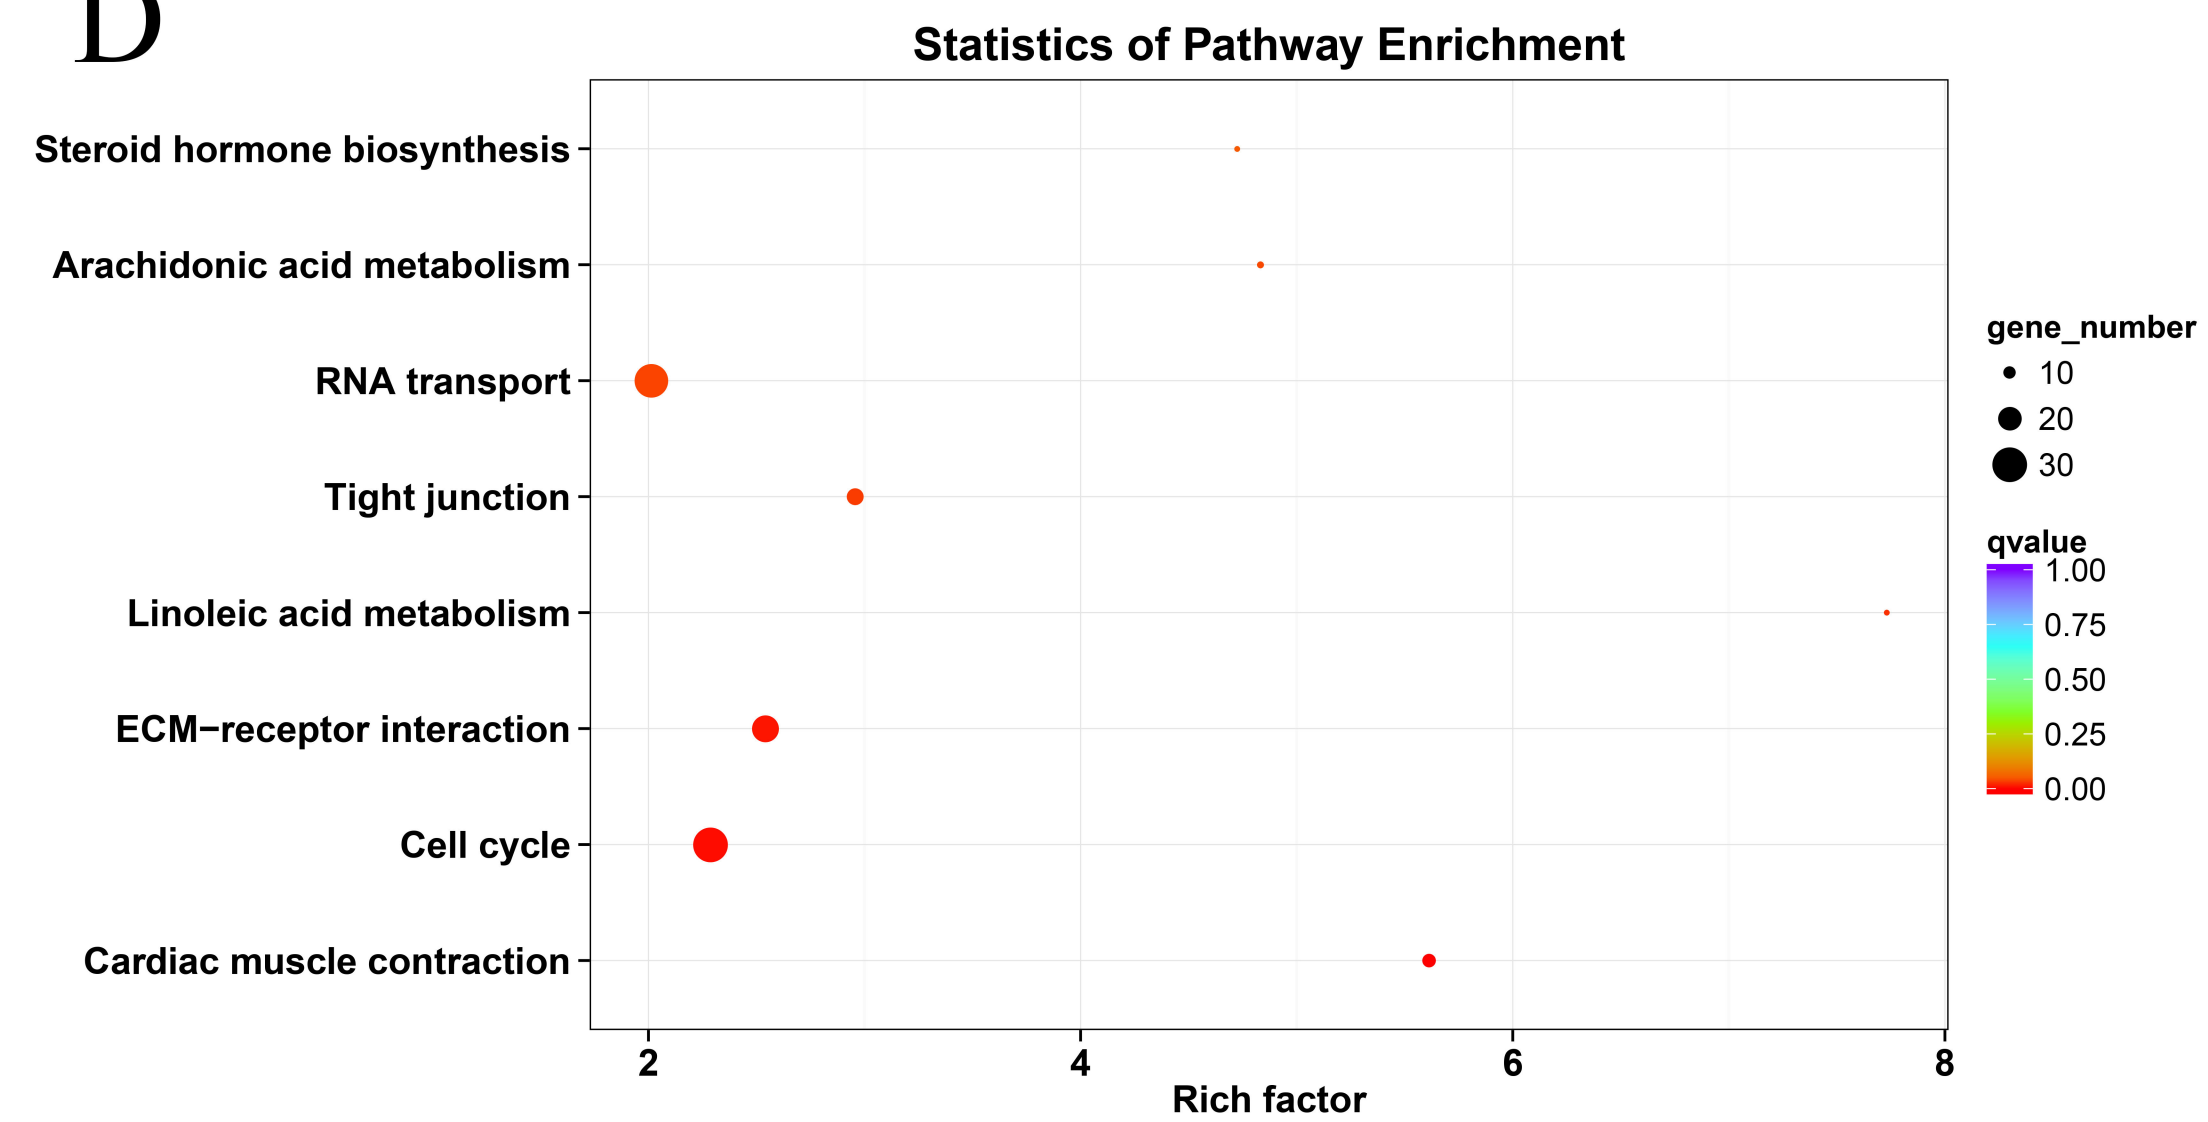

E

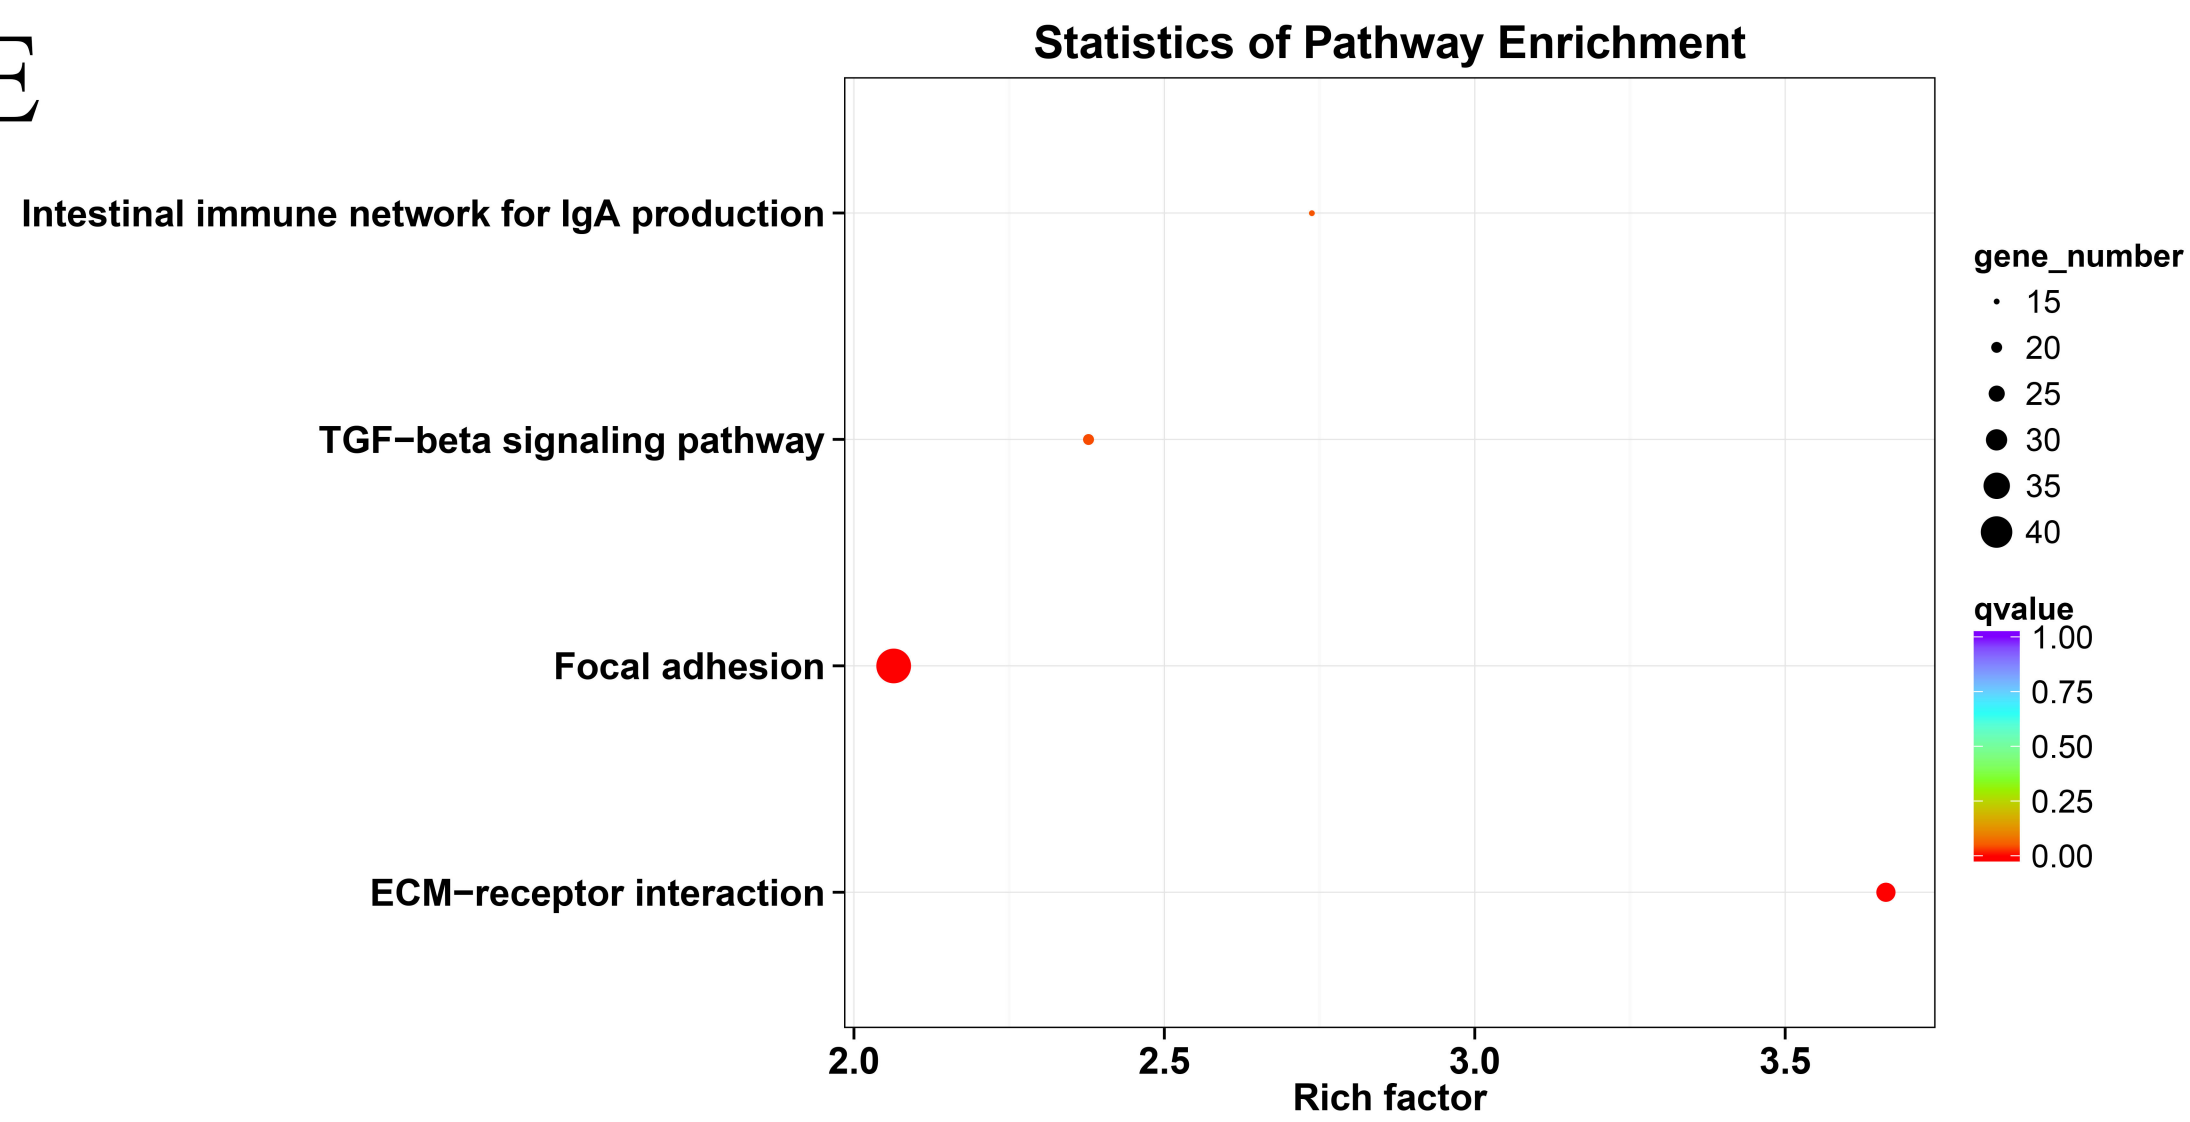

Supplement: s1 [file s1]

A

Term

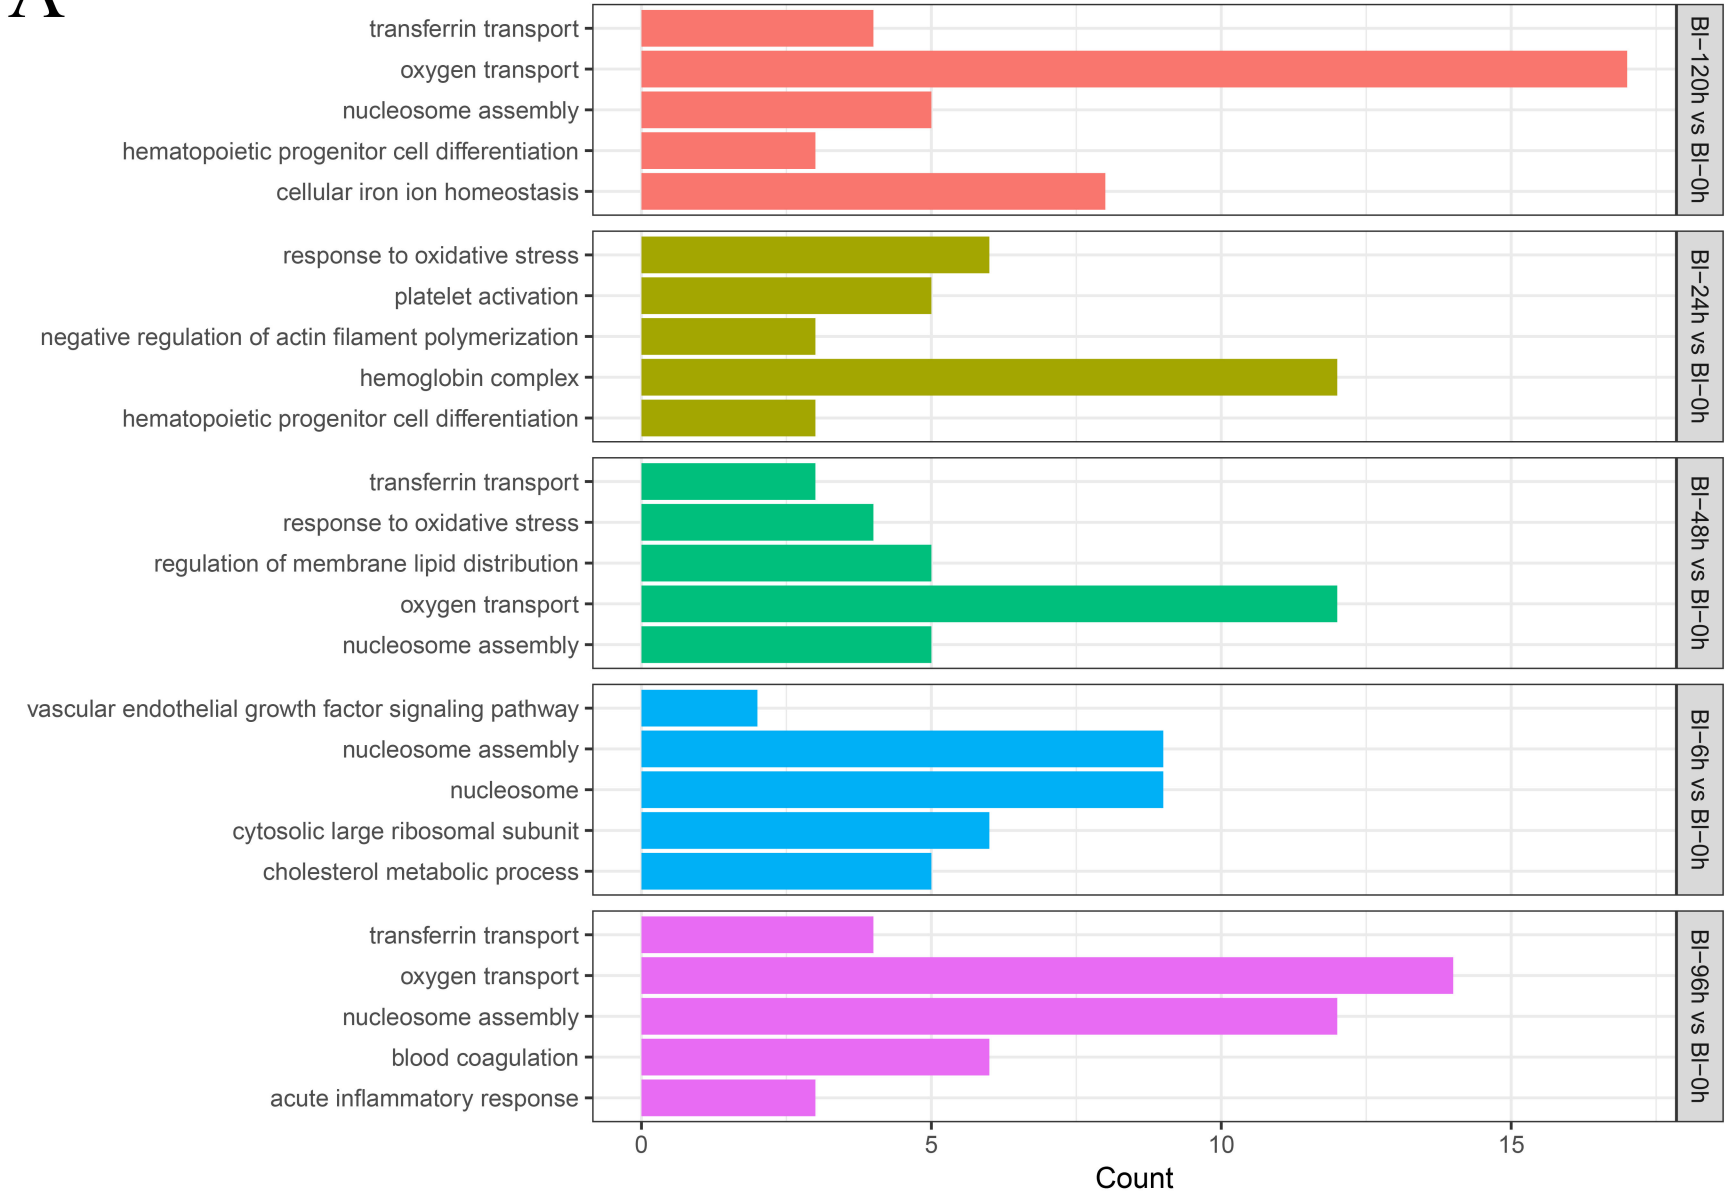

B

Term

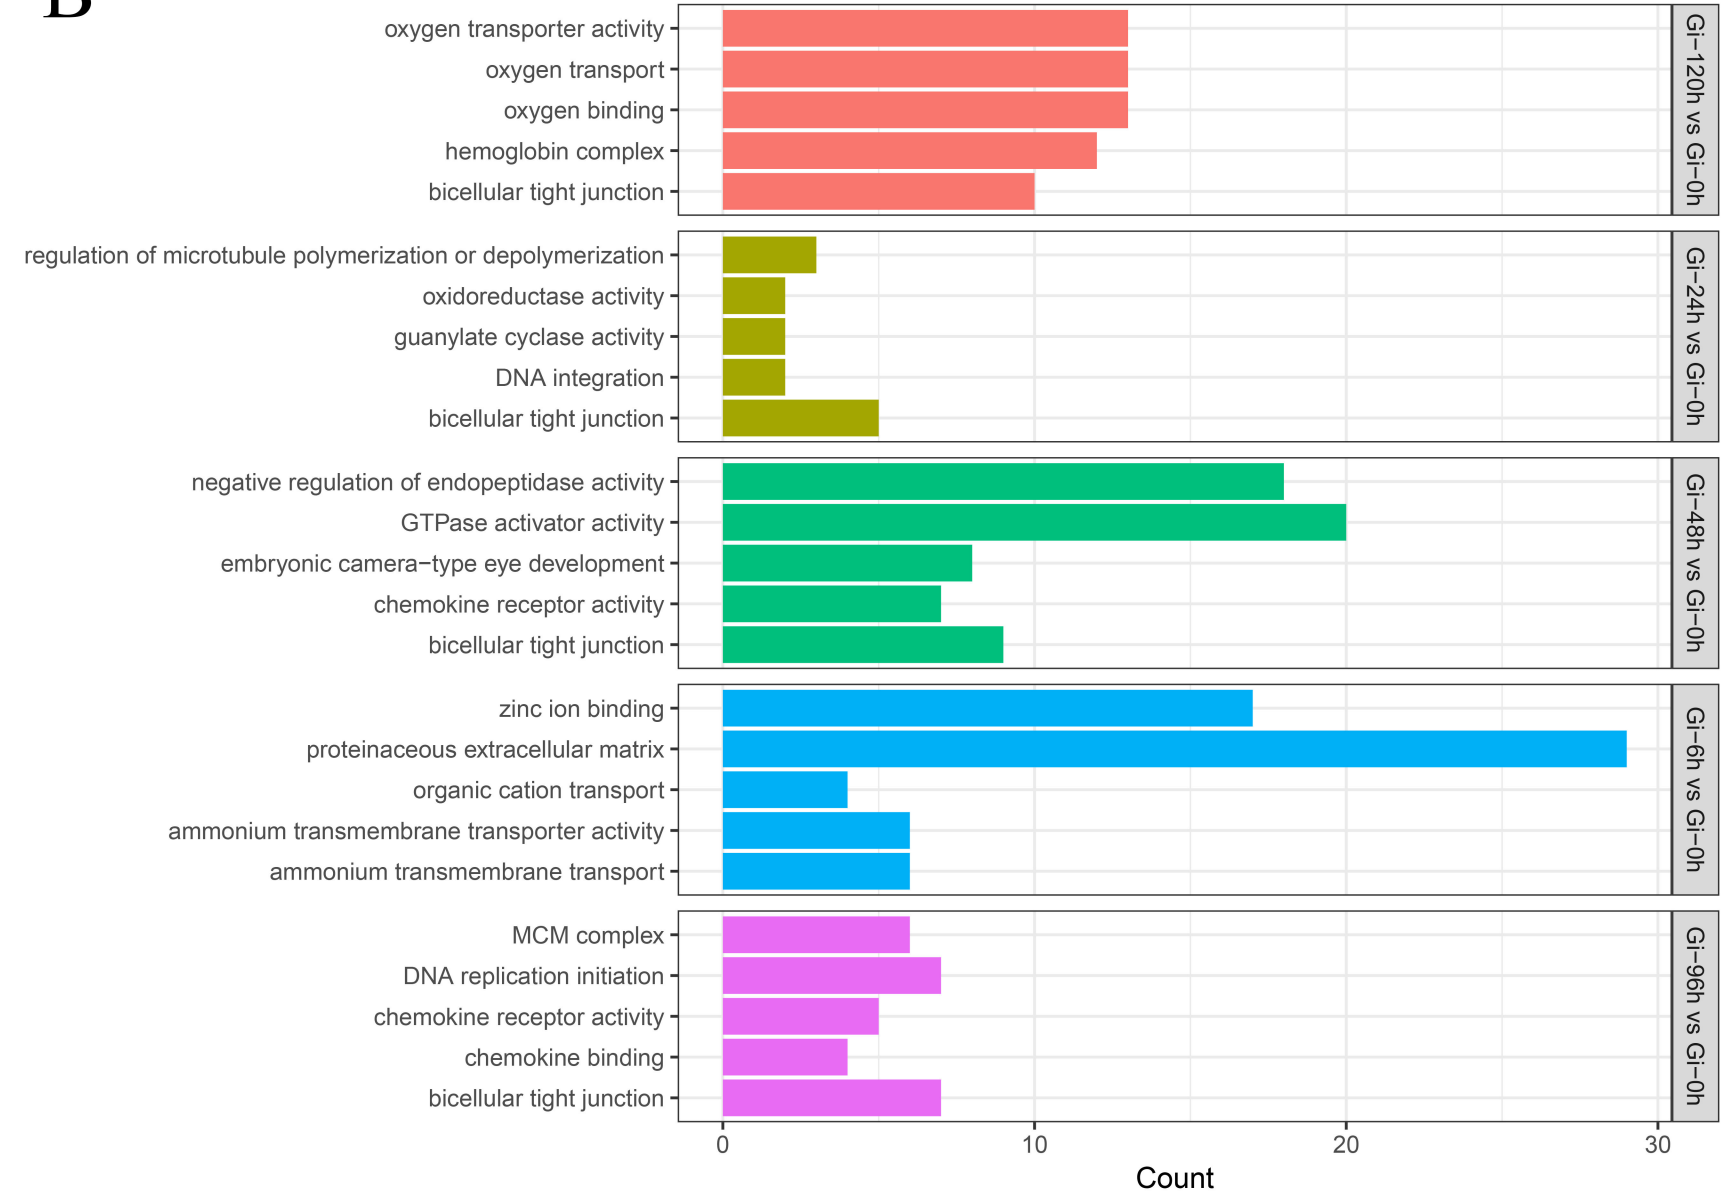

C

Term

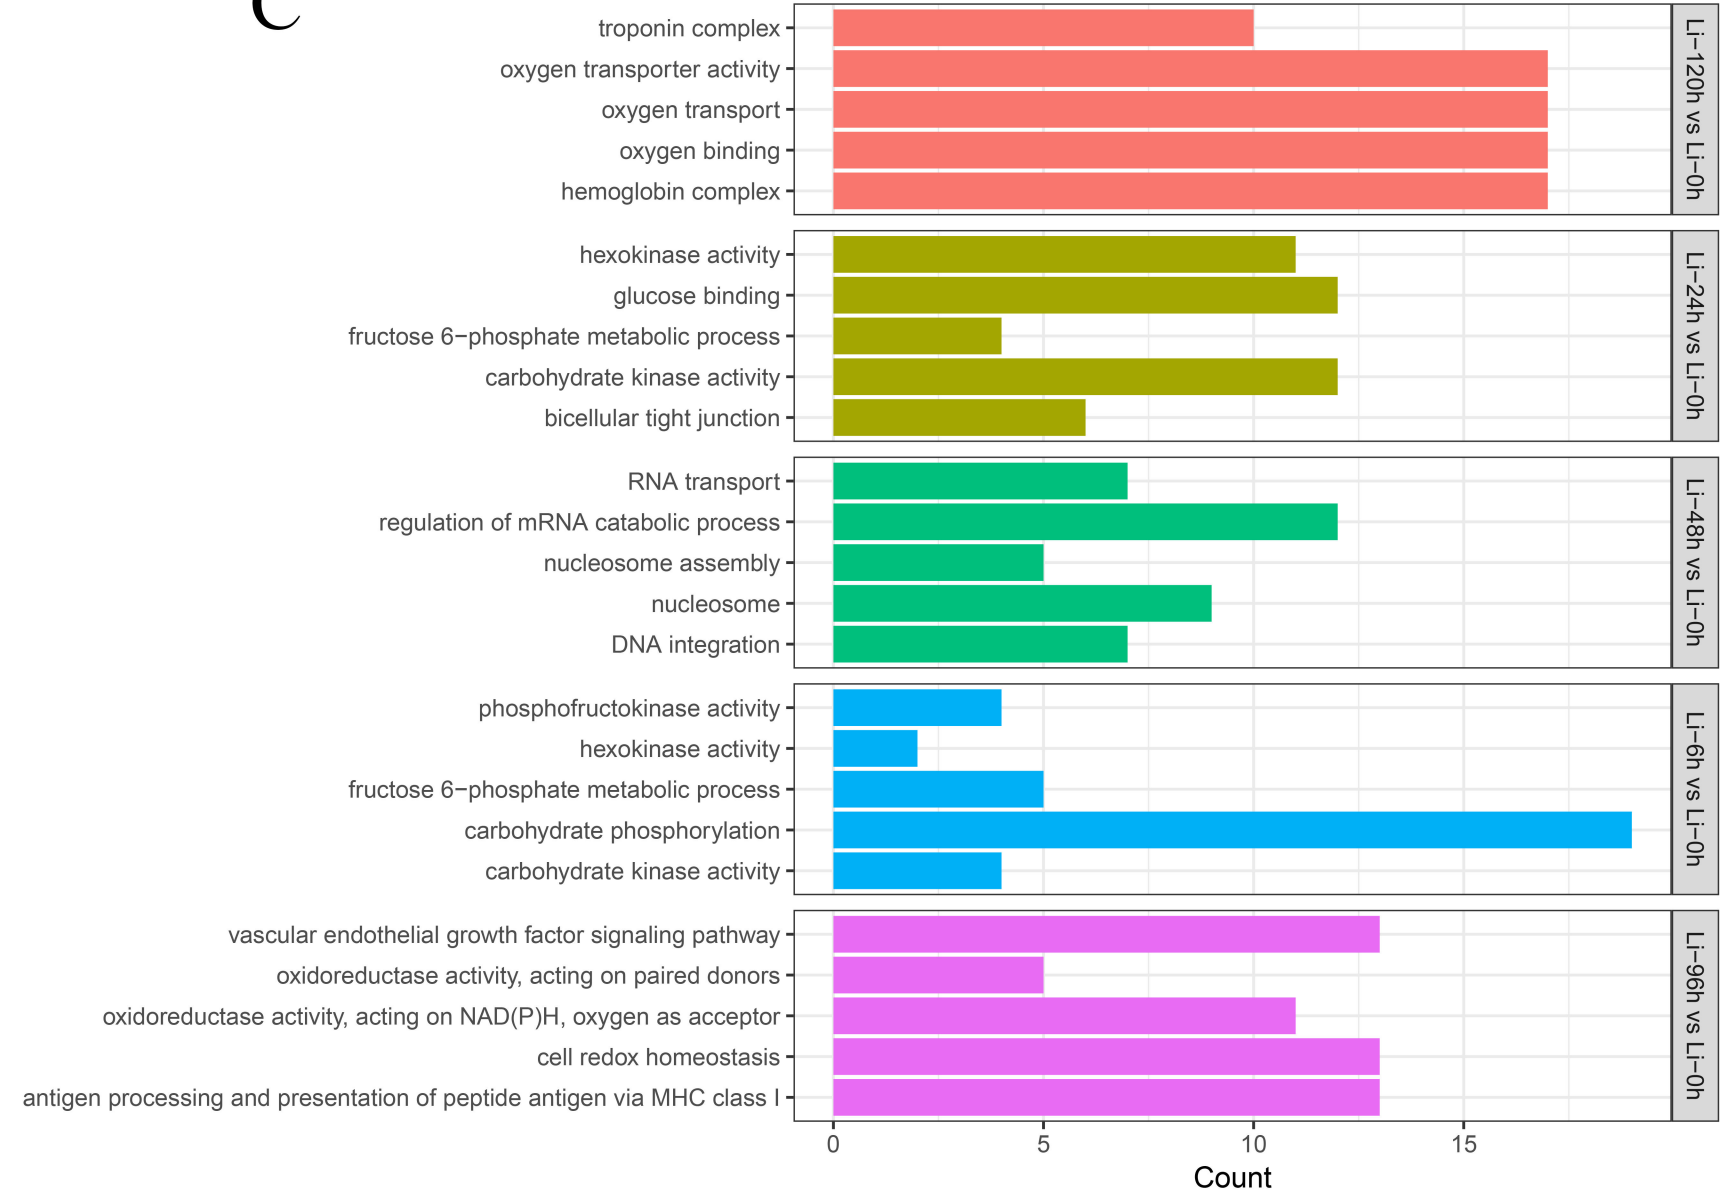

Supplement: s1 [file s1]

A

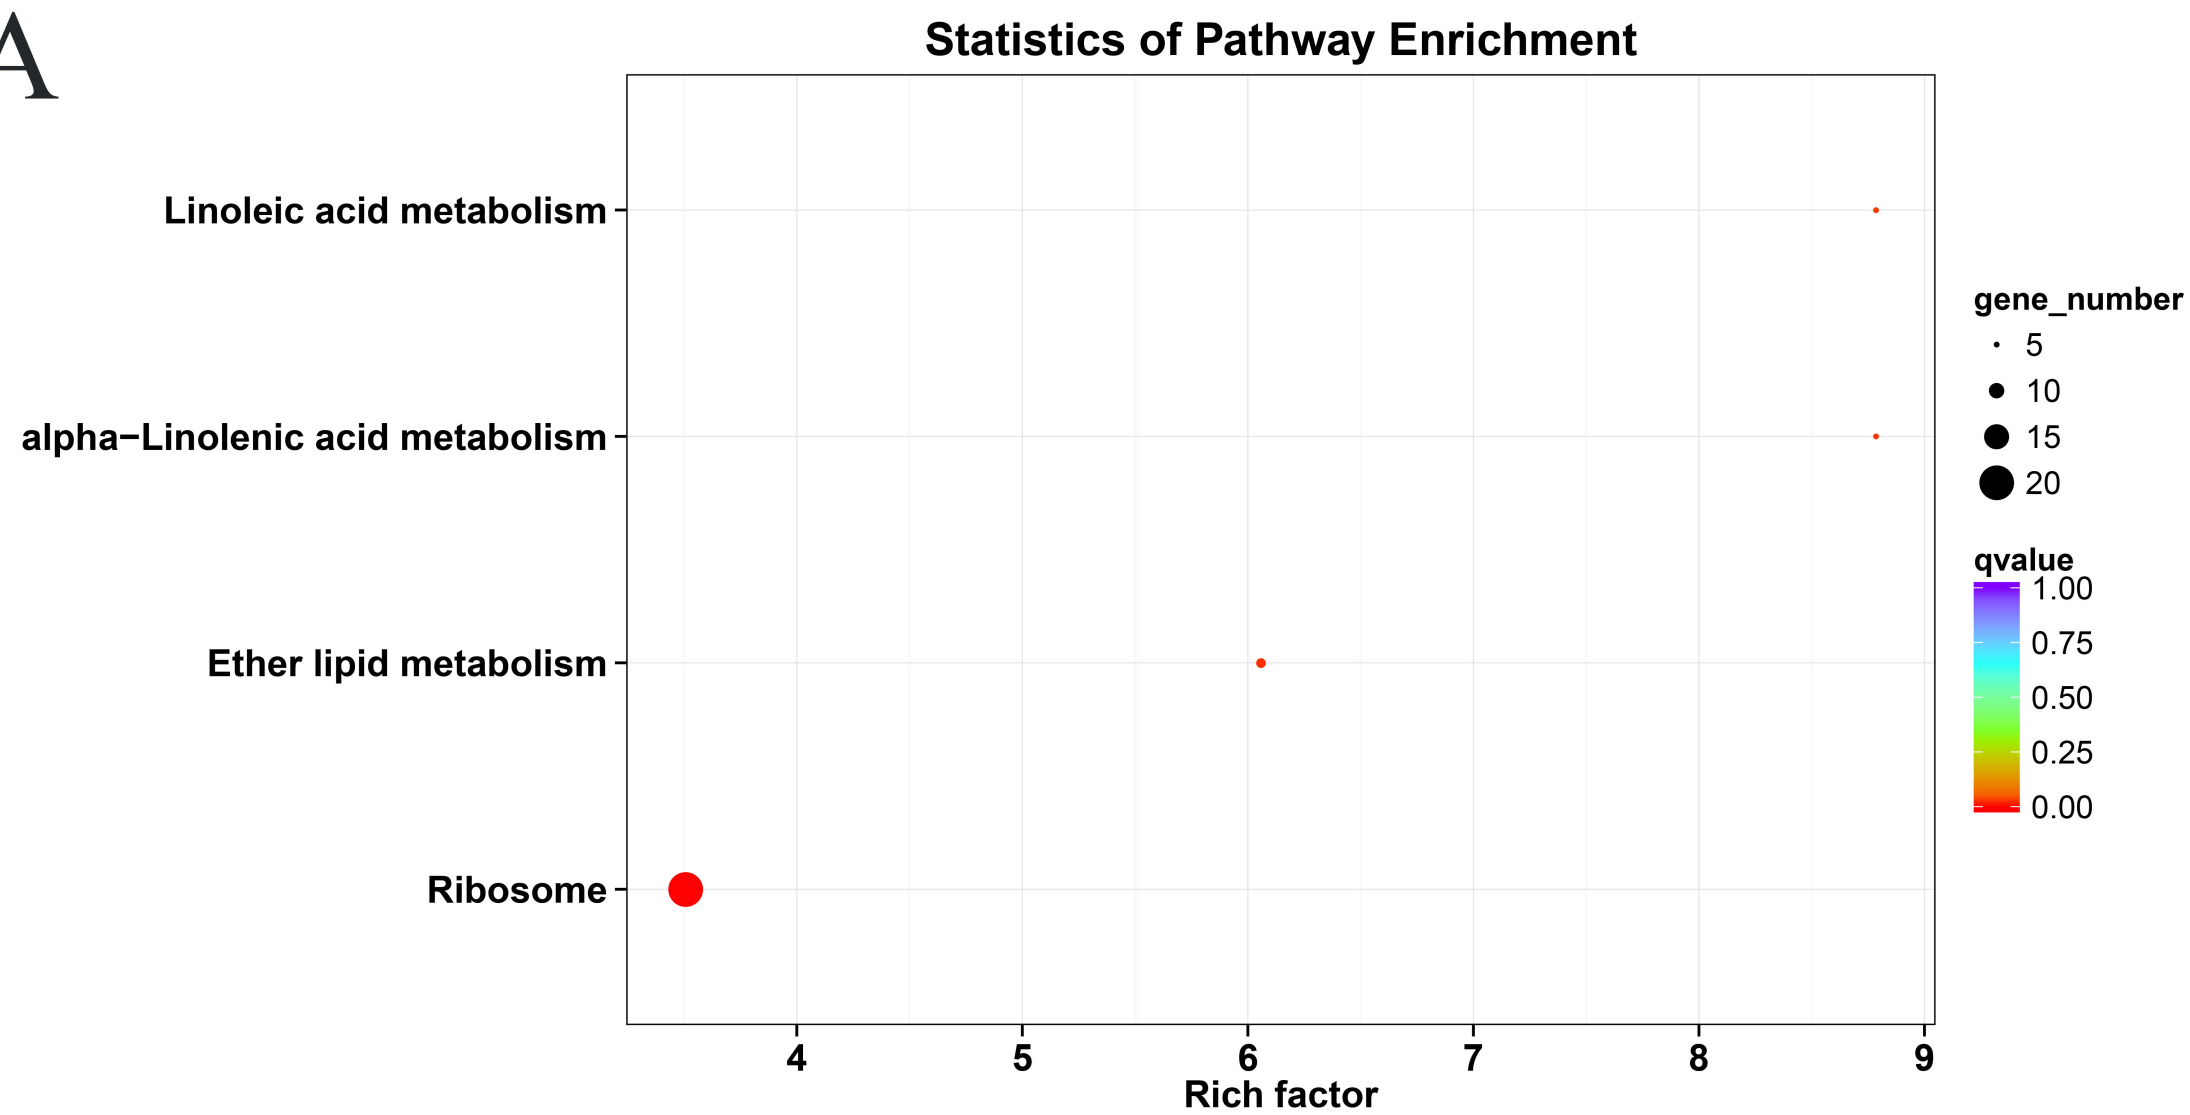

B

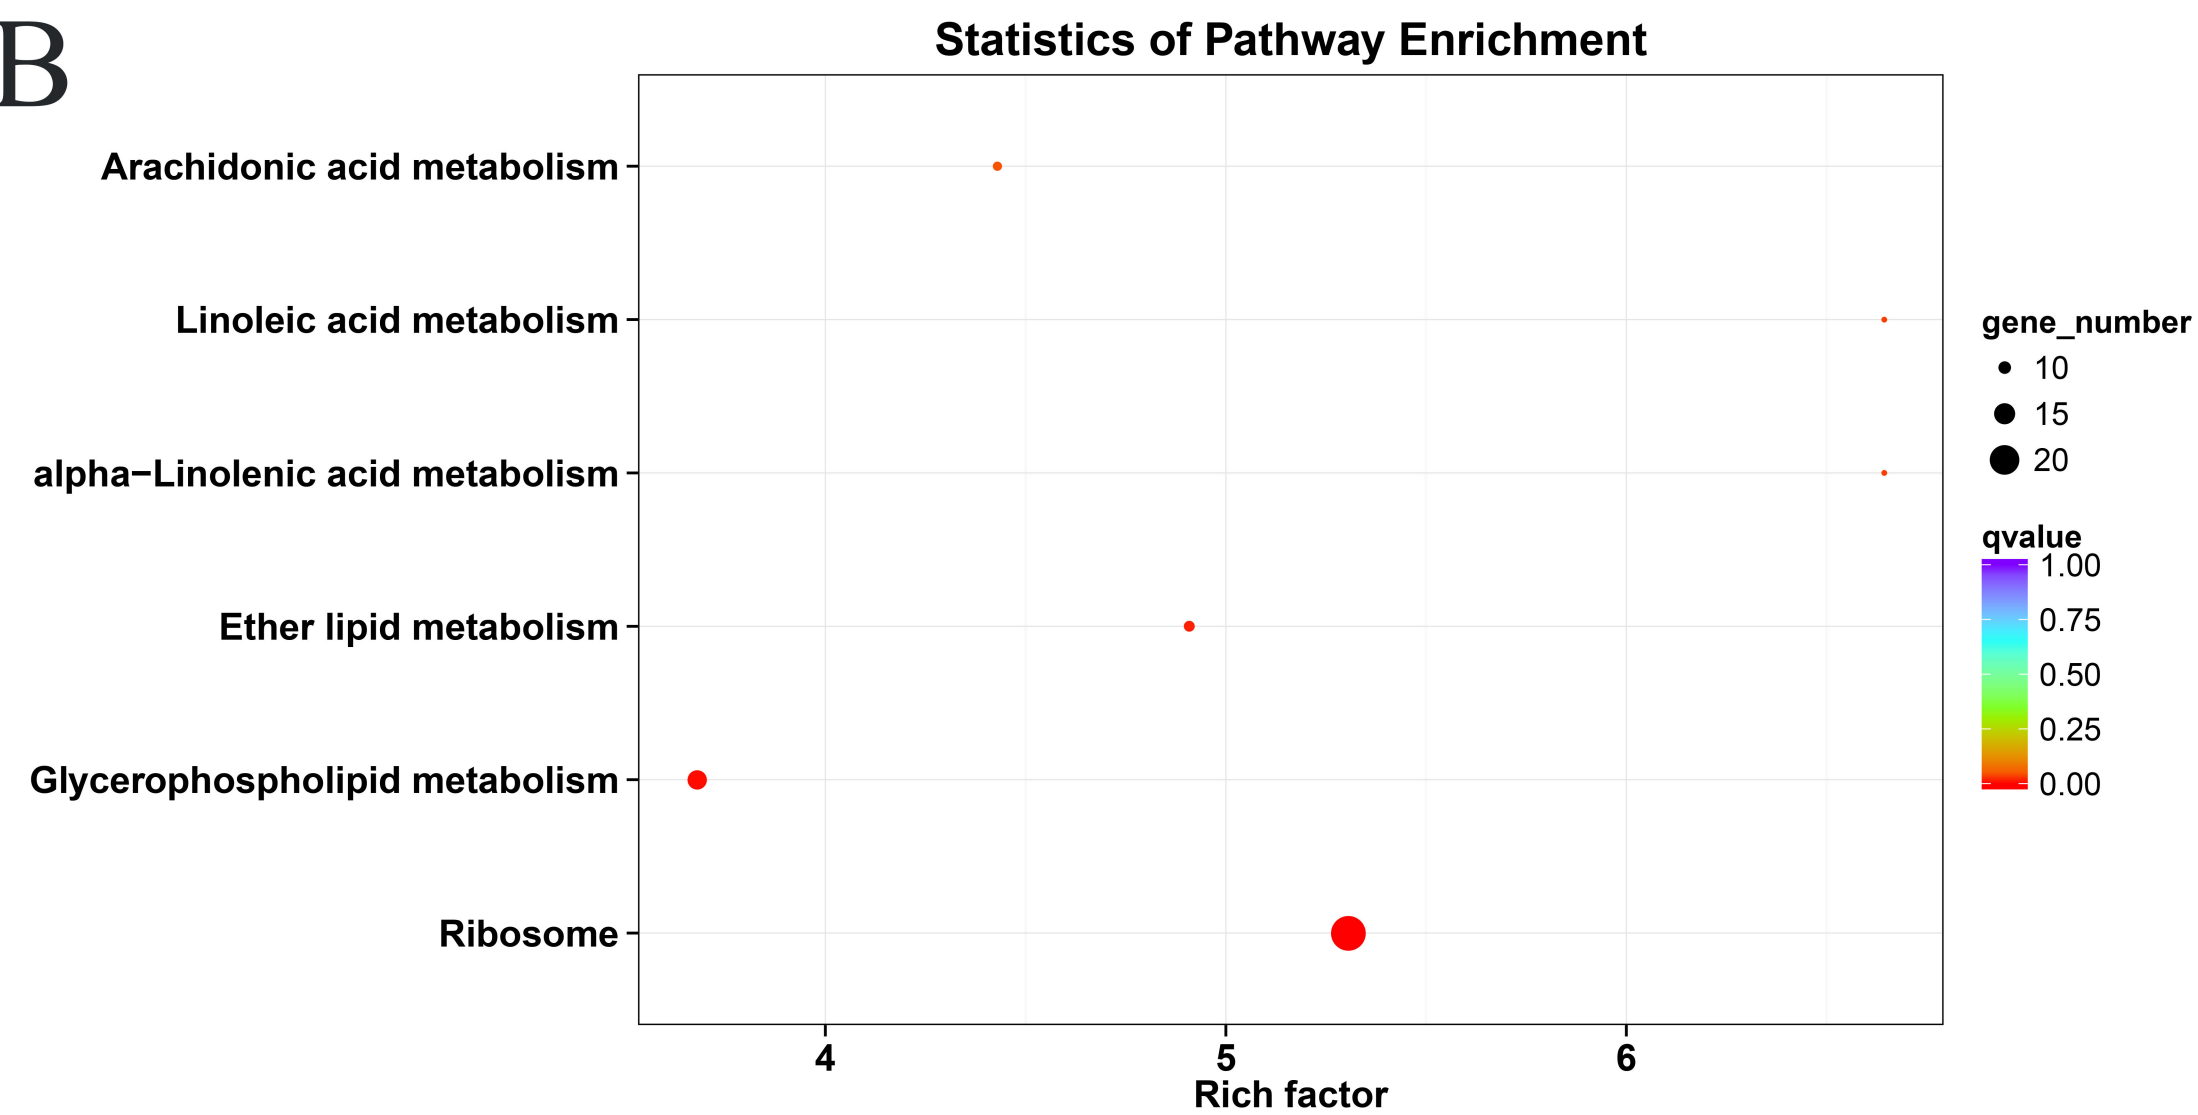

C

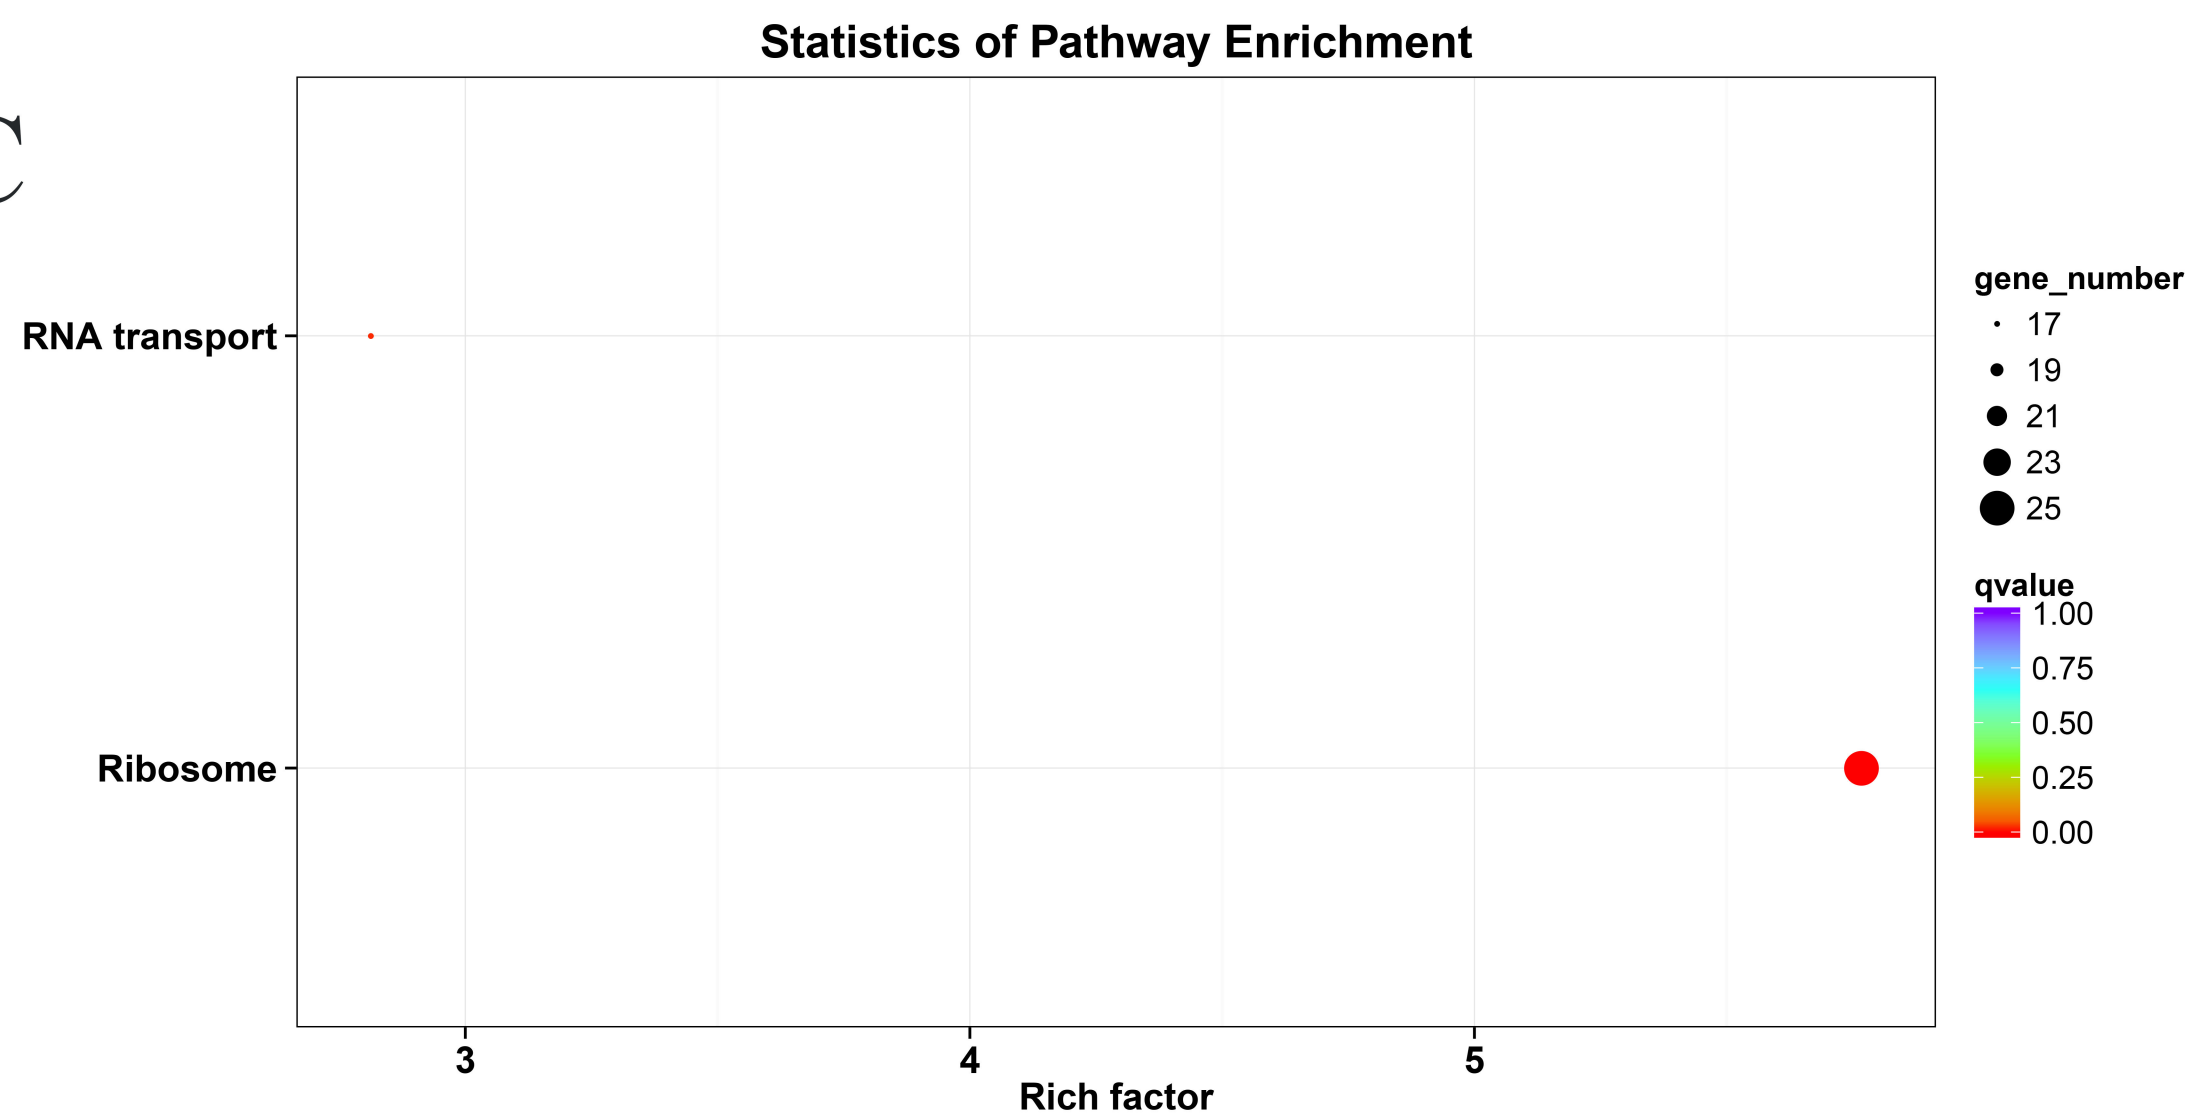

D

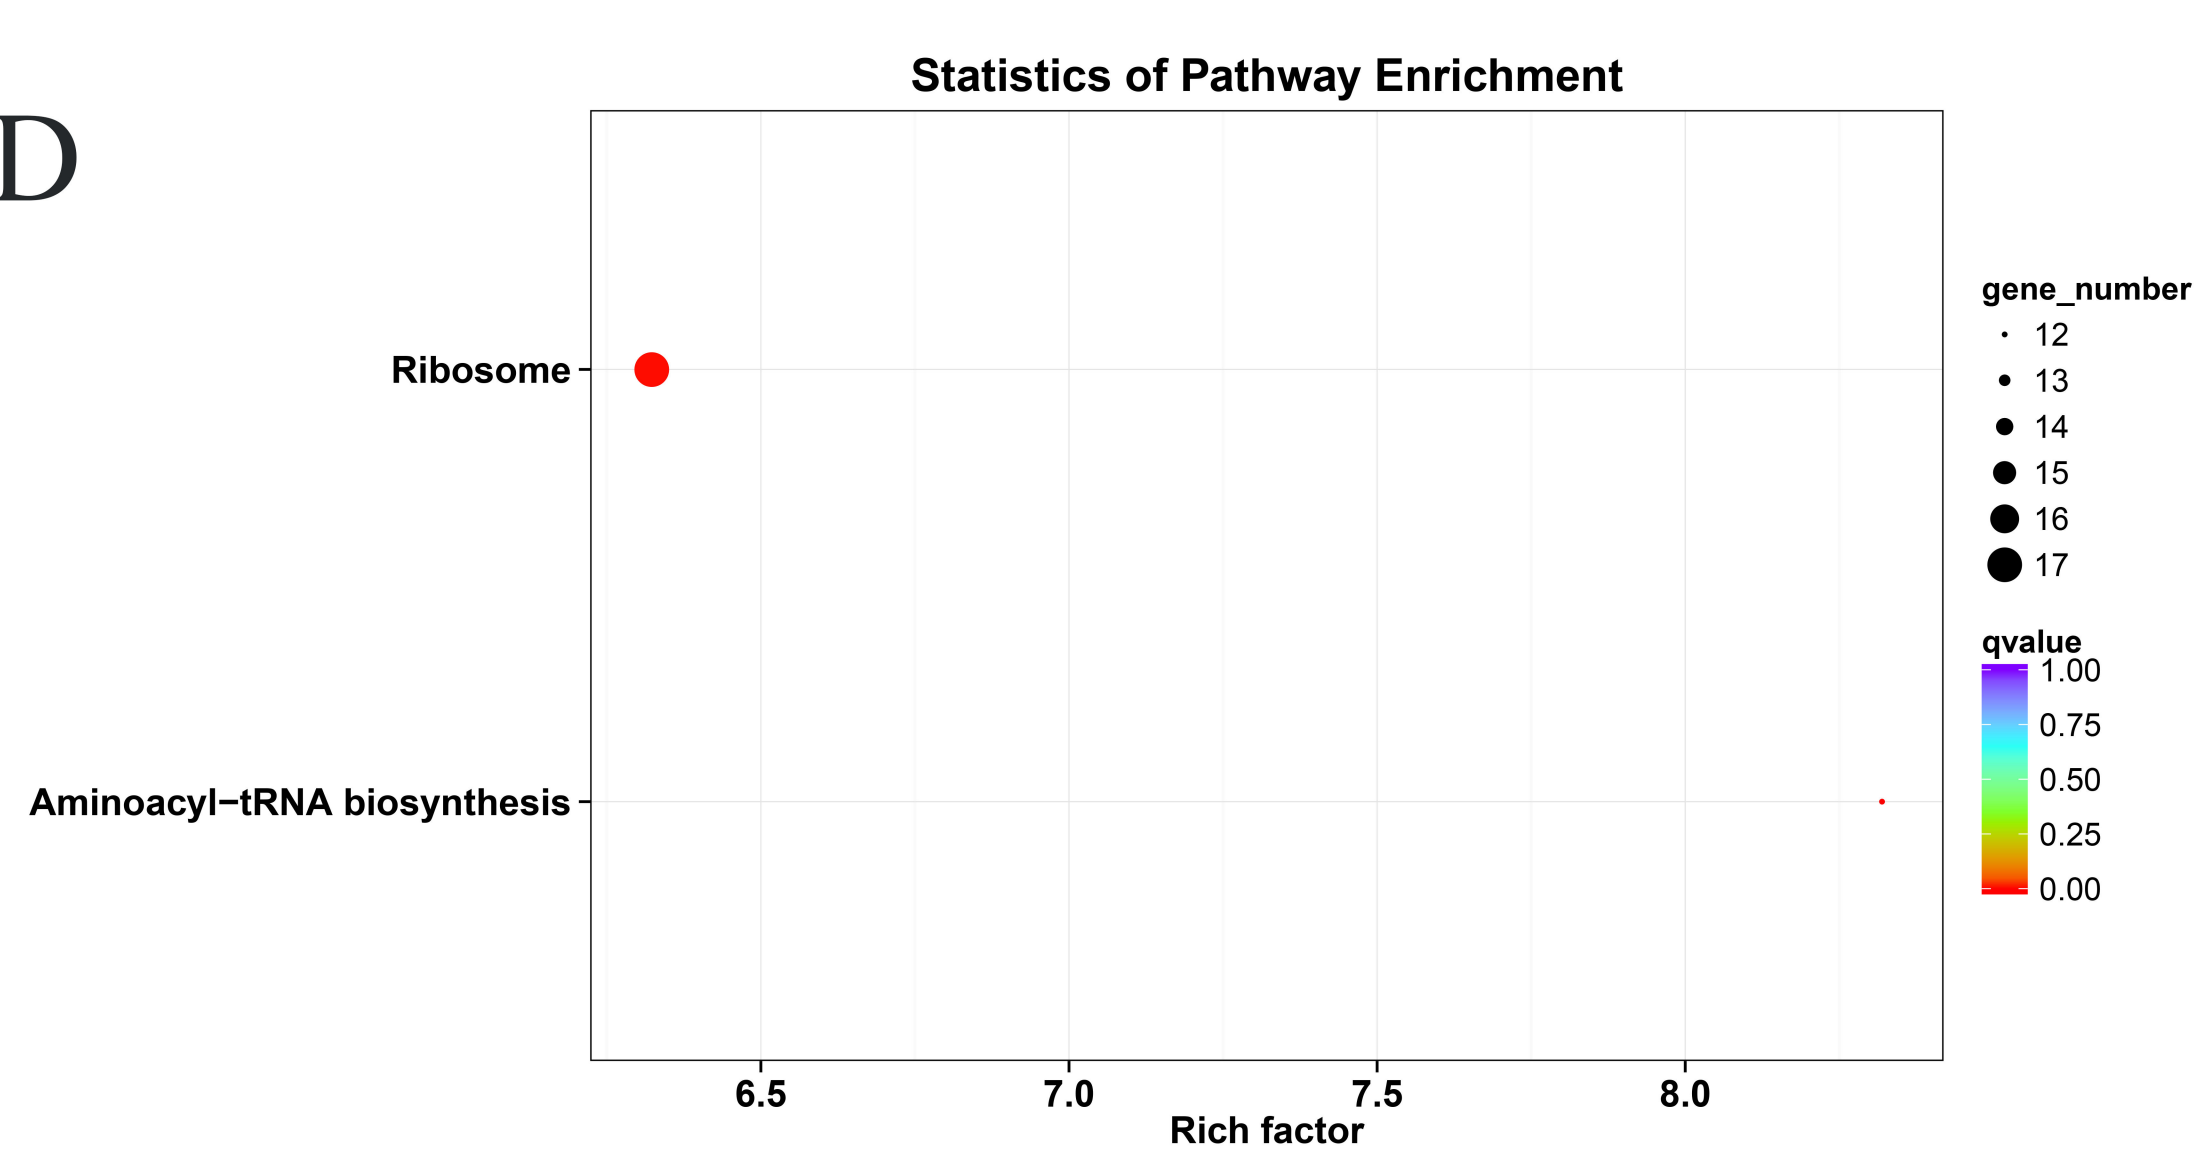

E

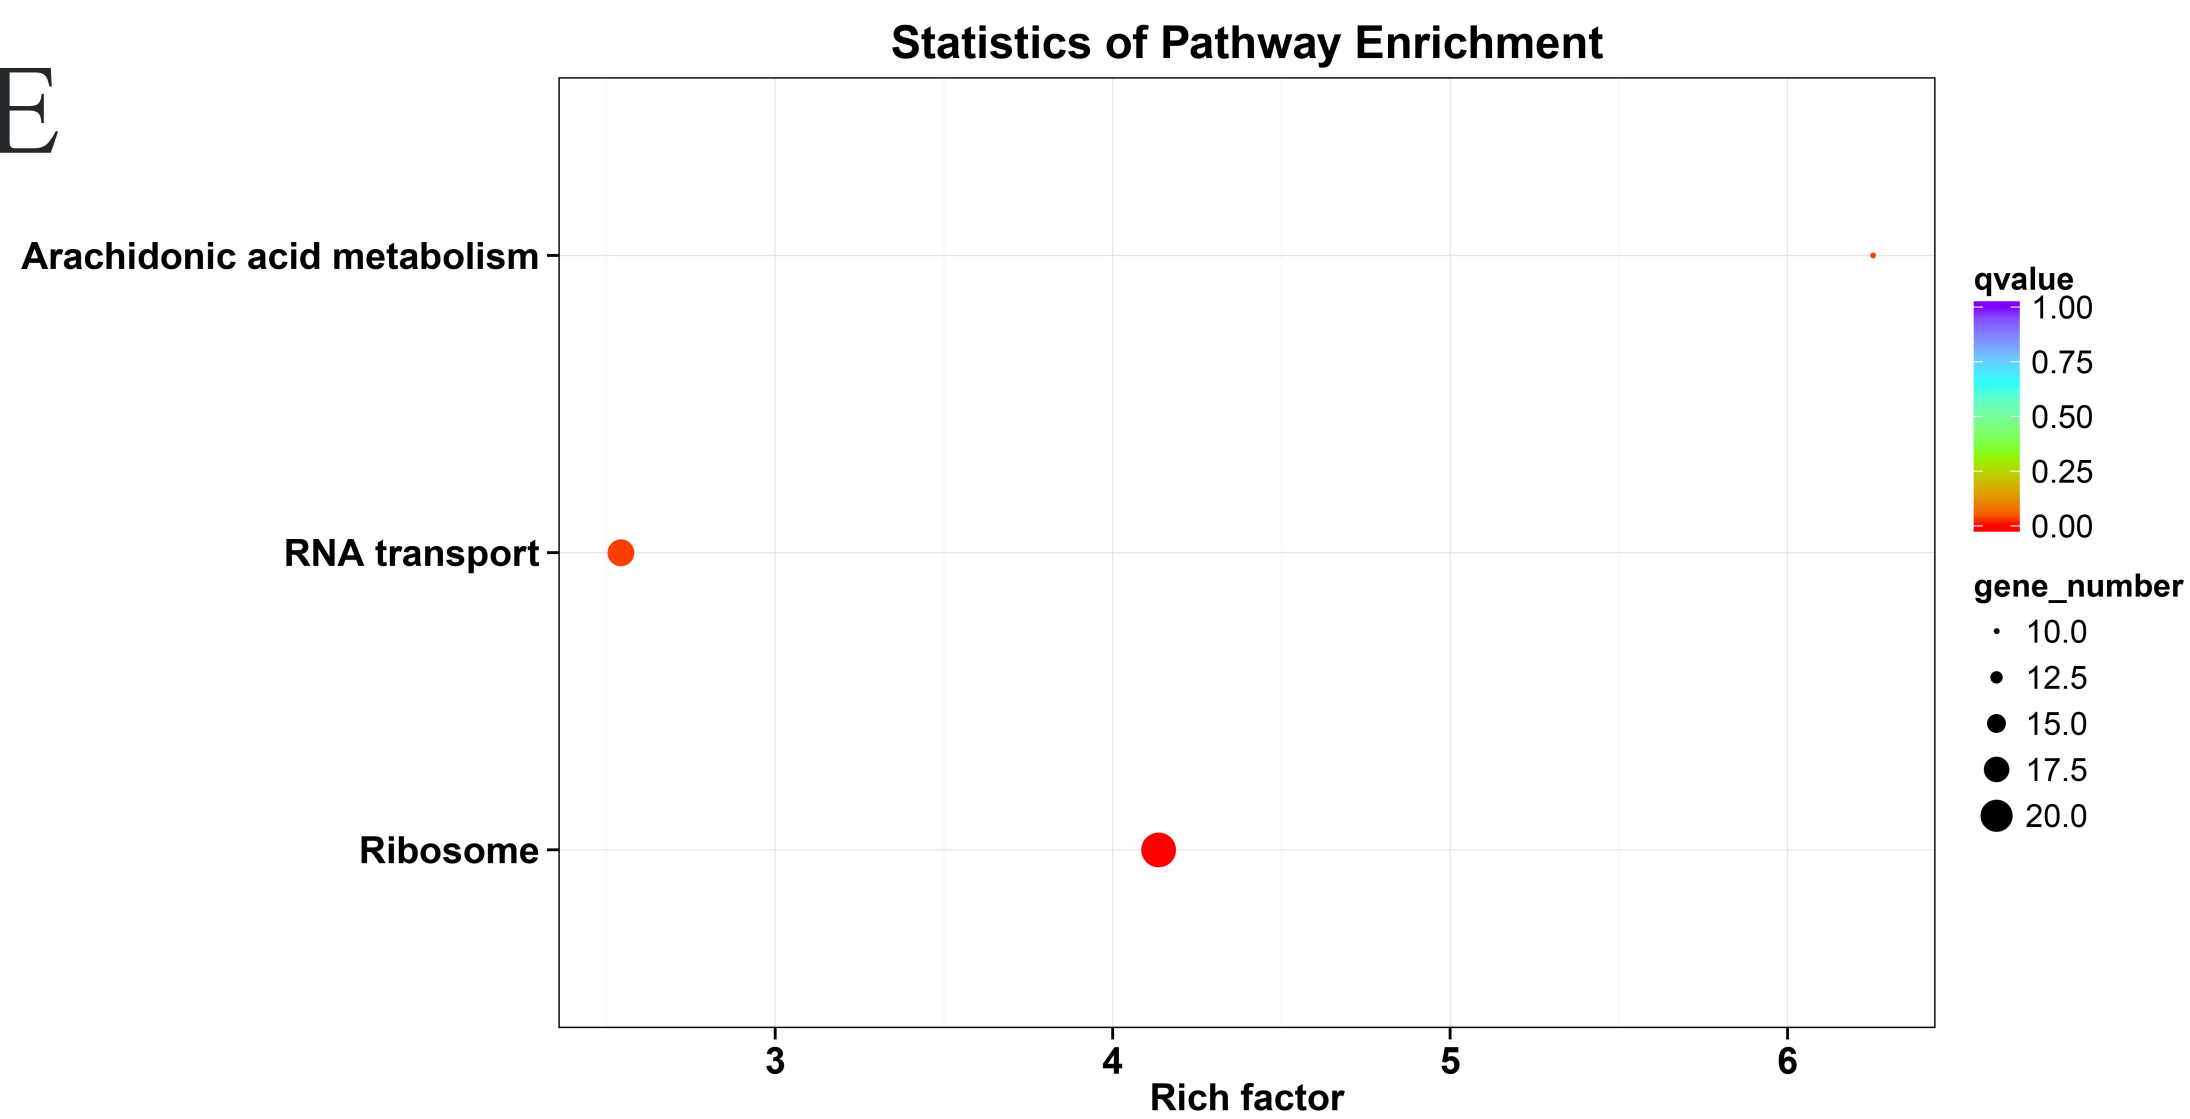

Supplement: s1 [file s1]

A

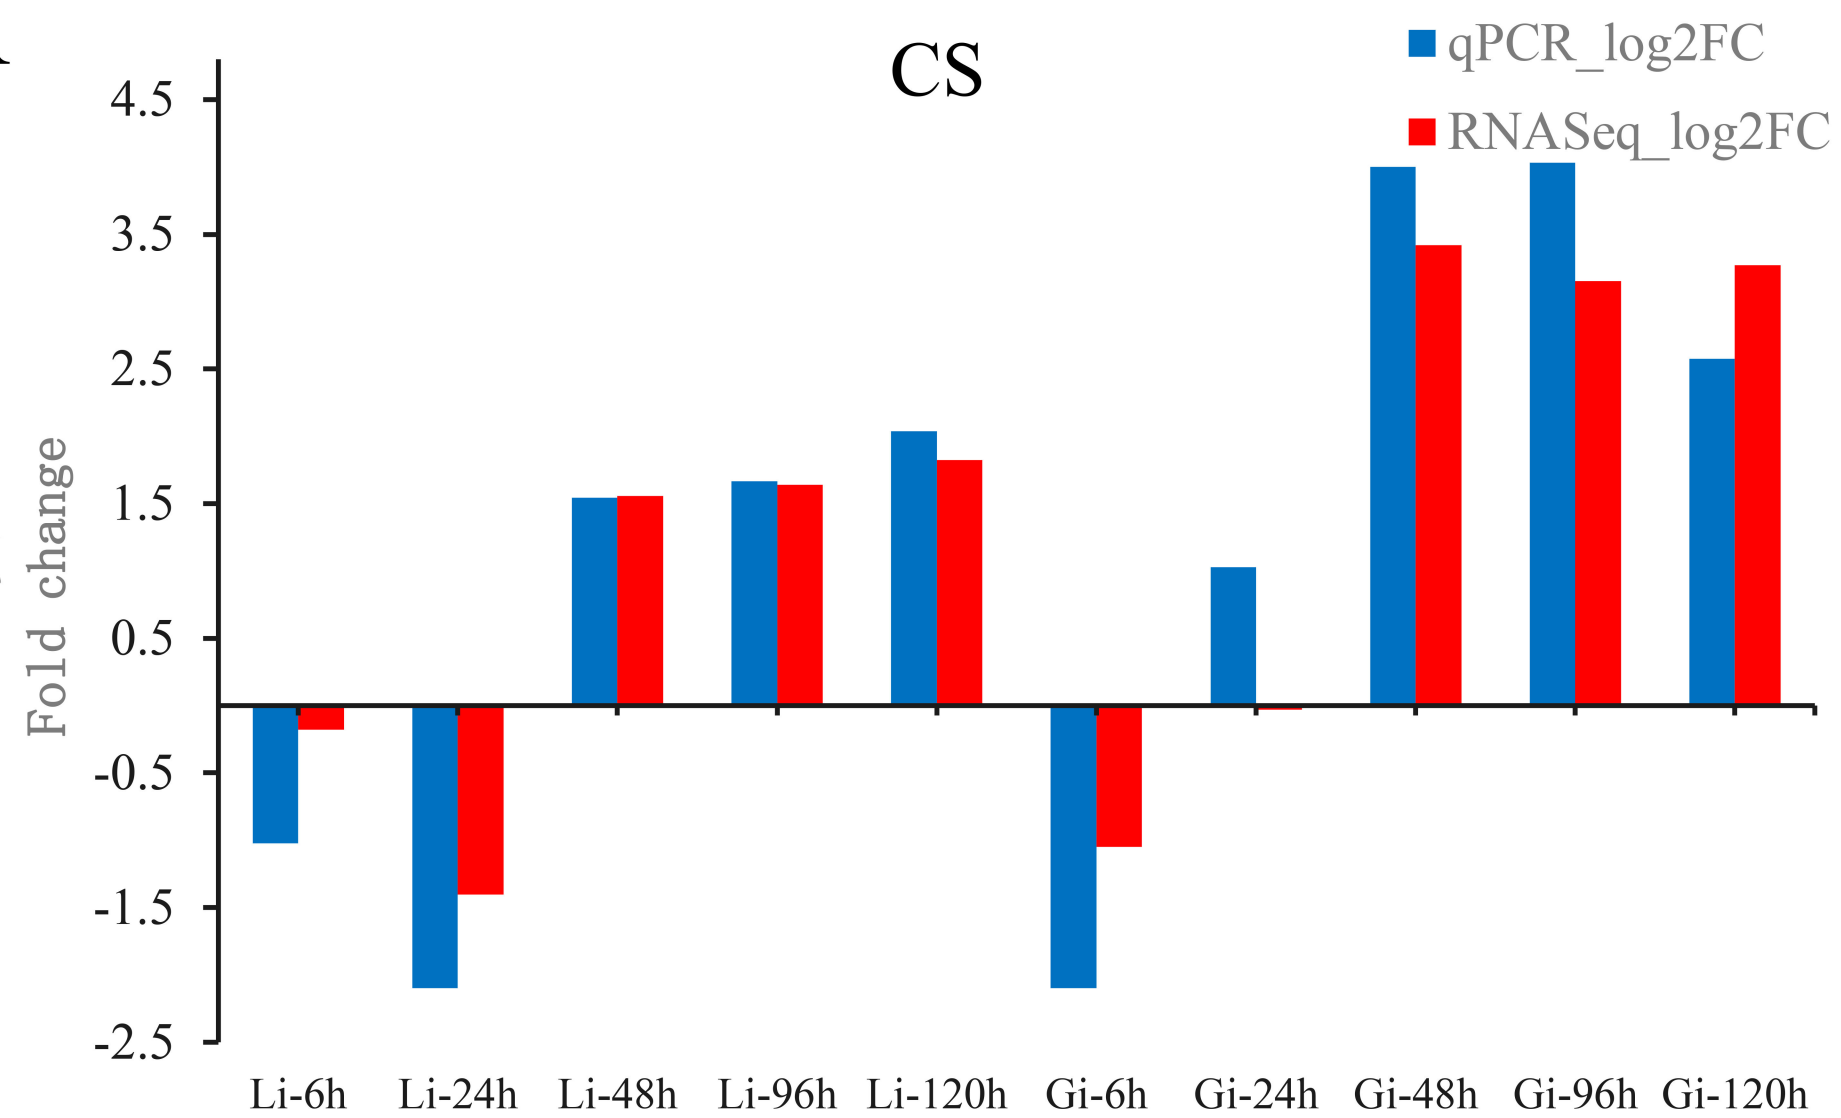

B

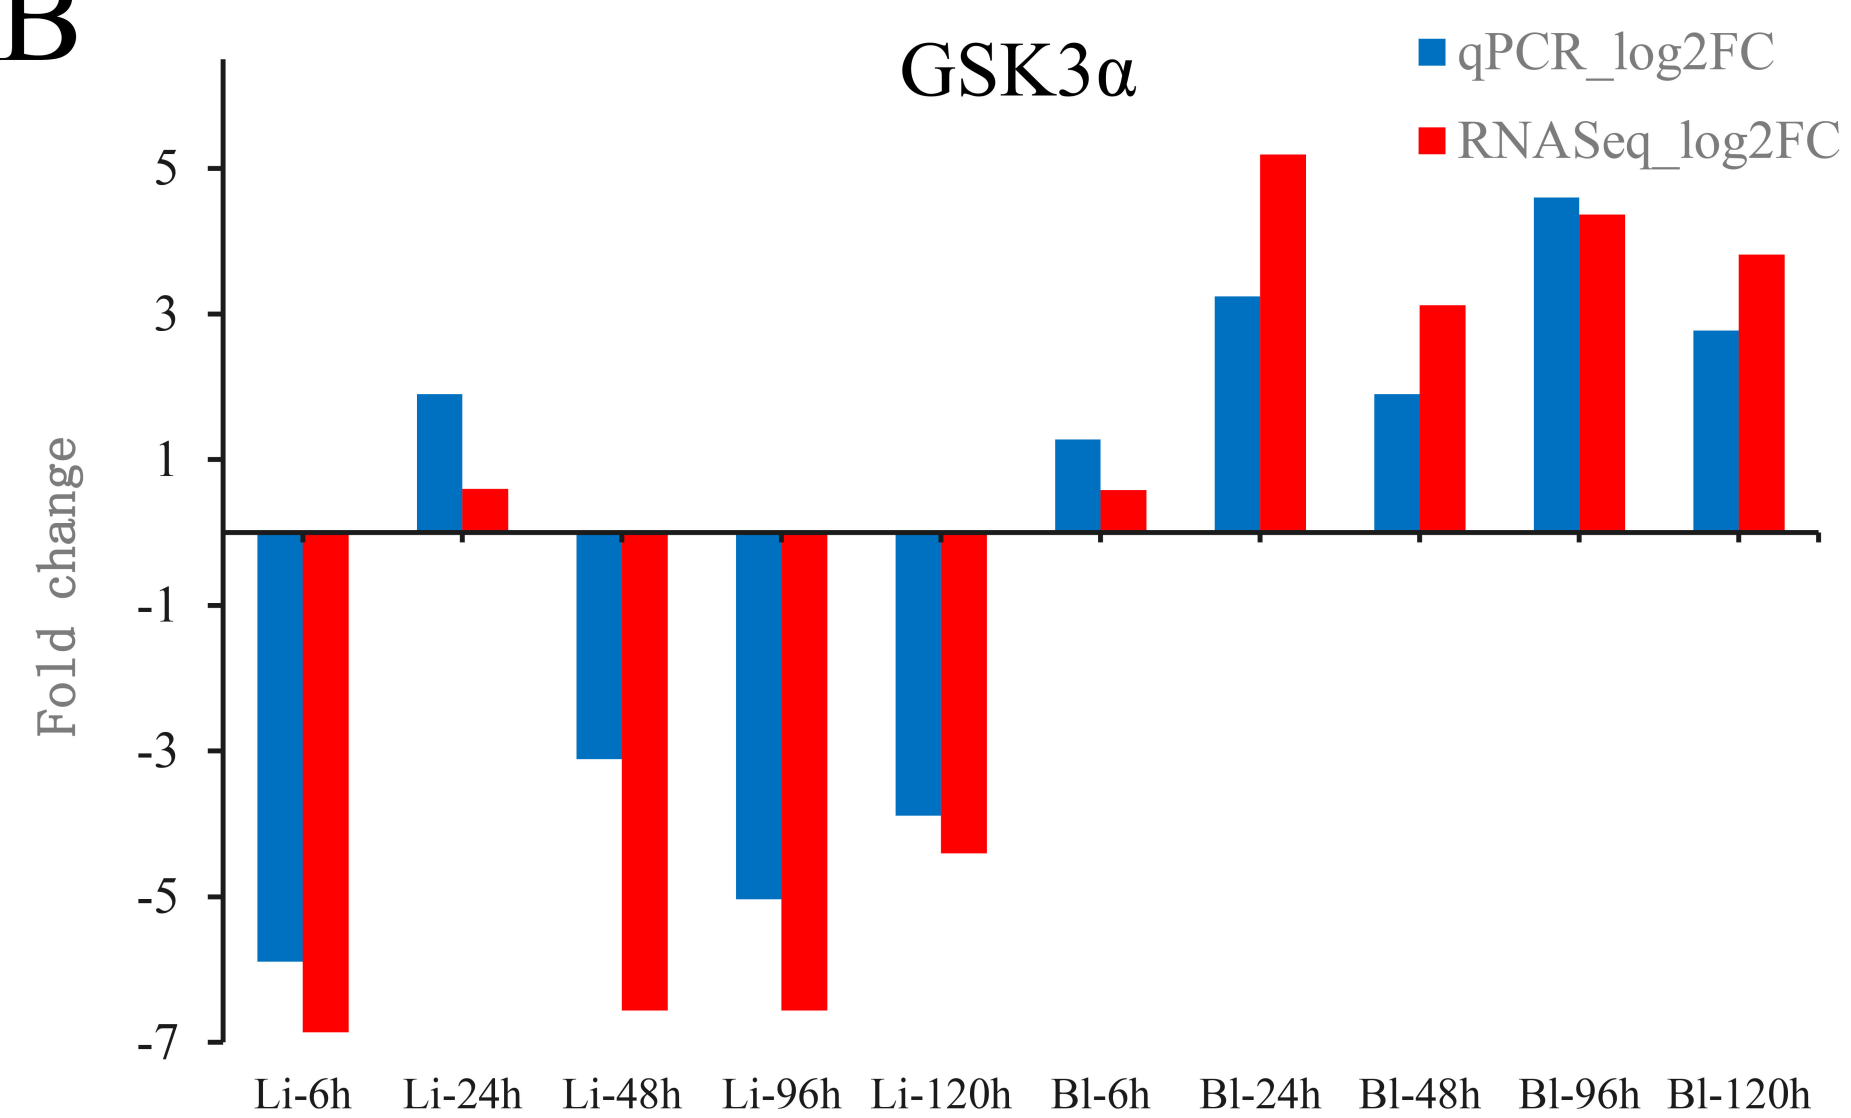

C

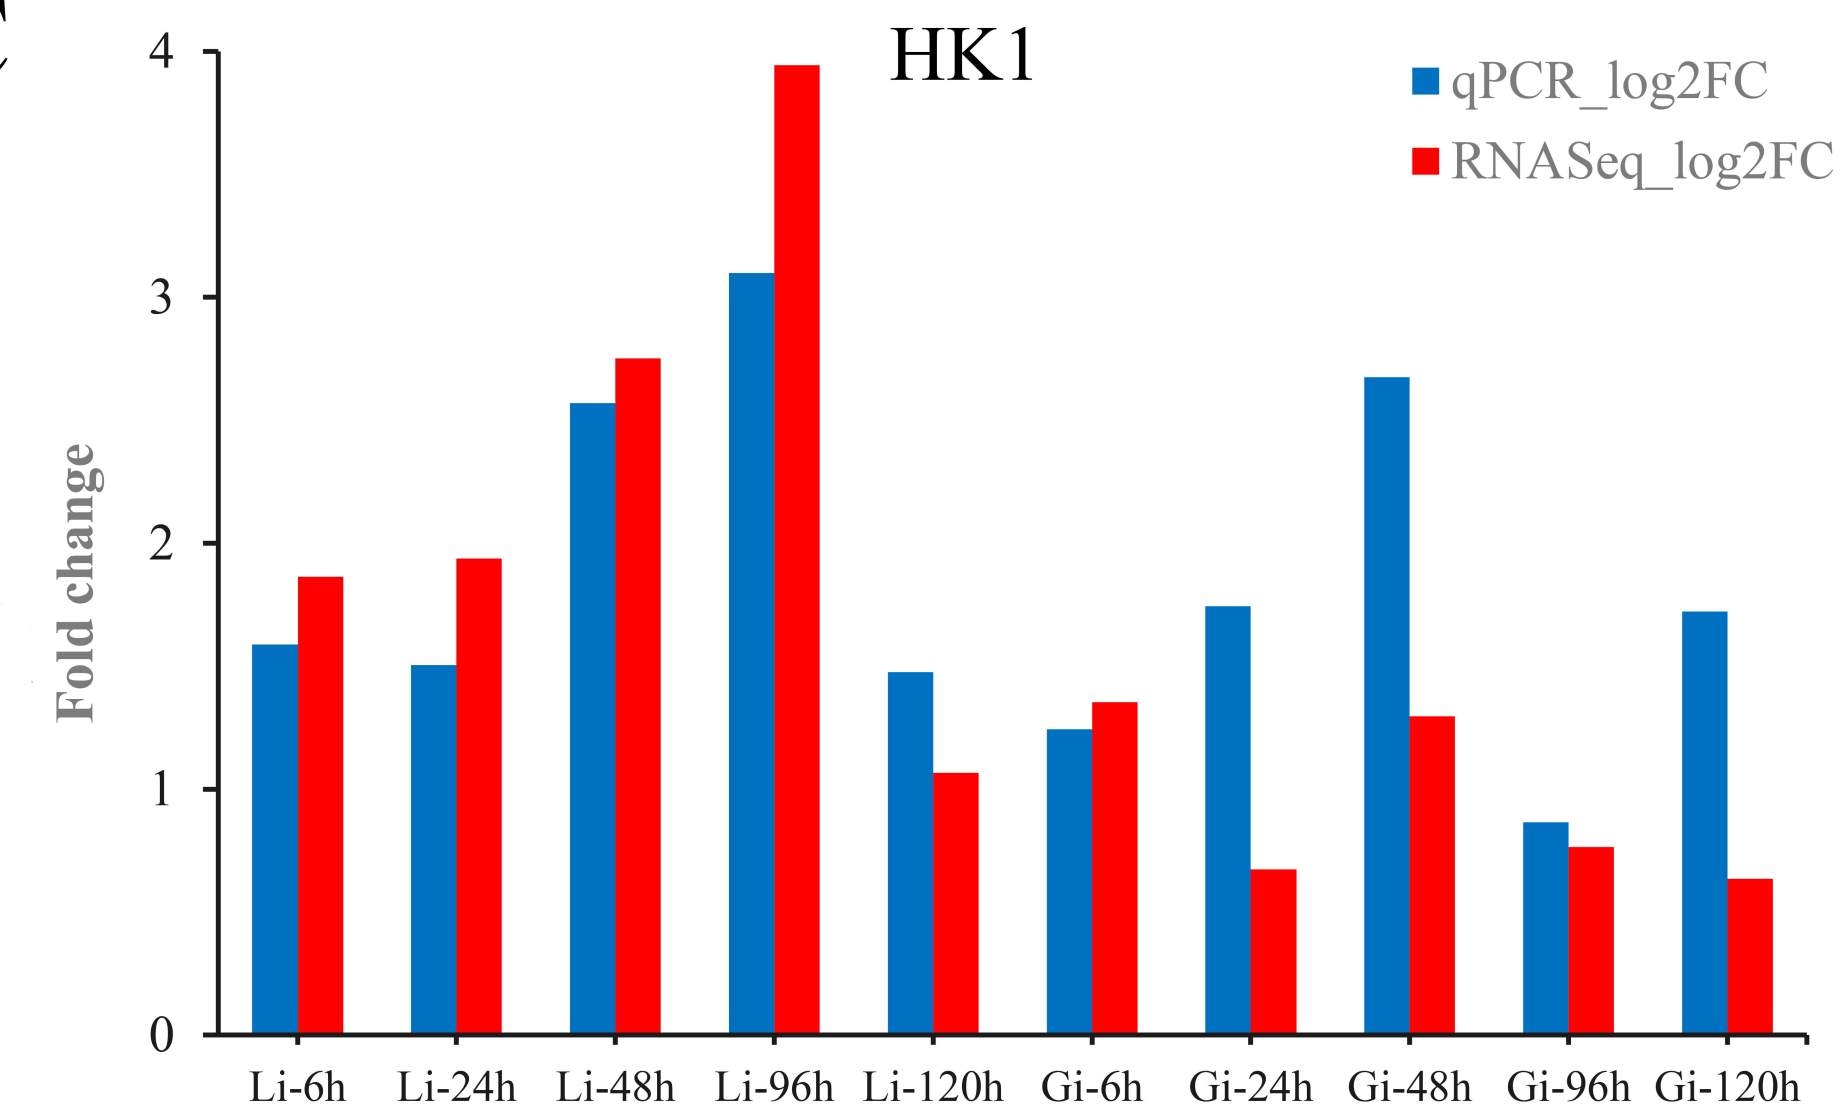

D

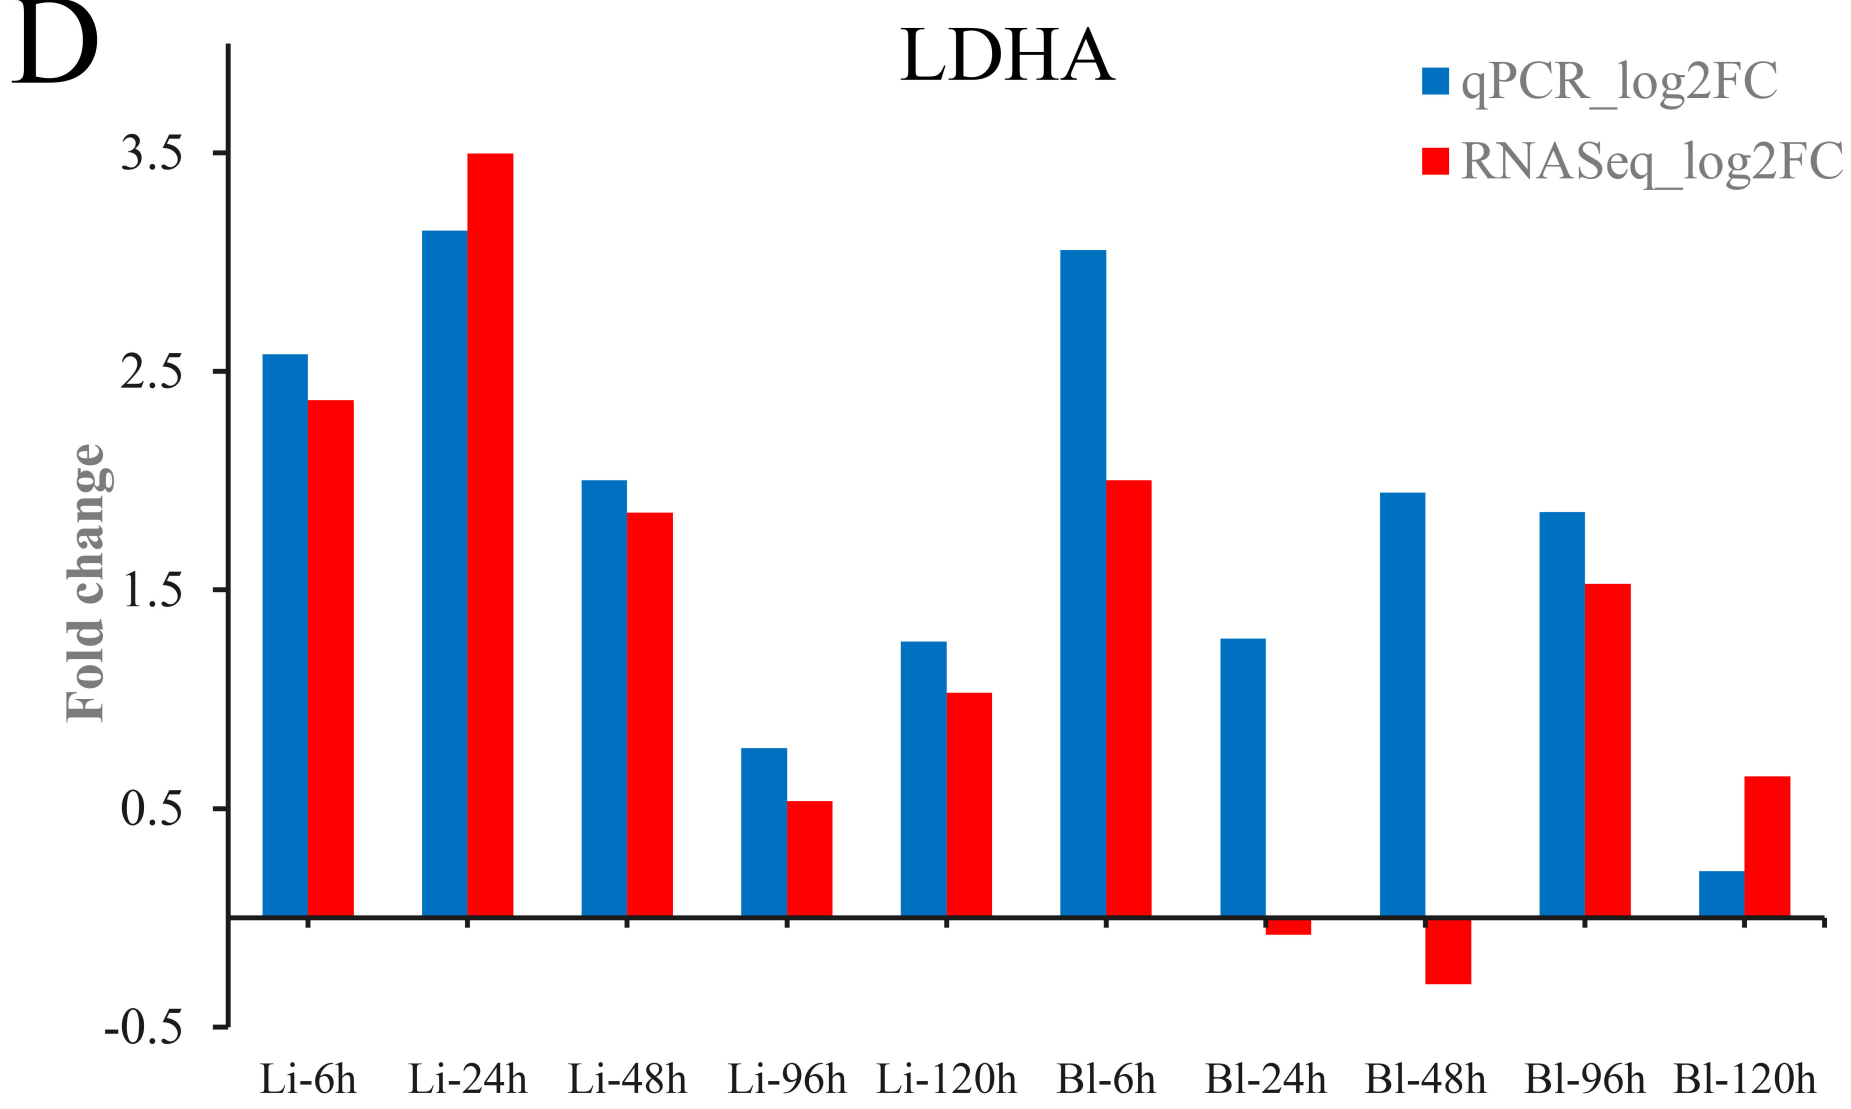

E

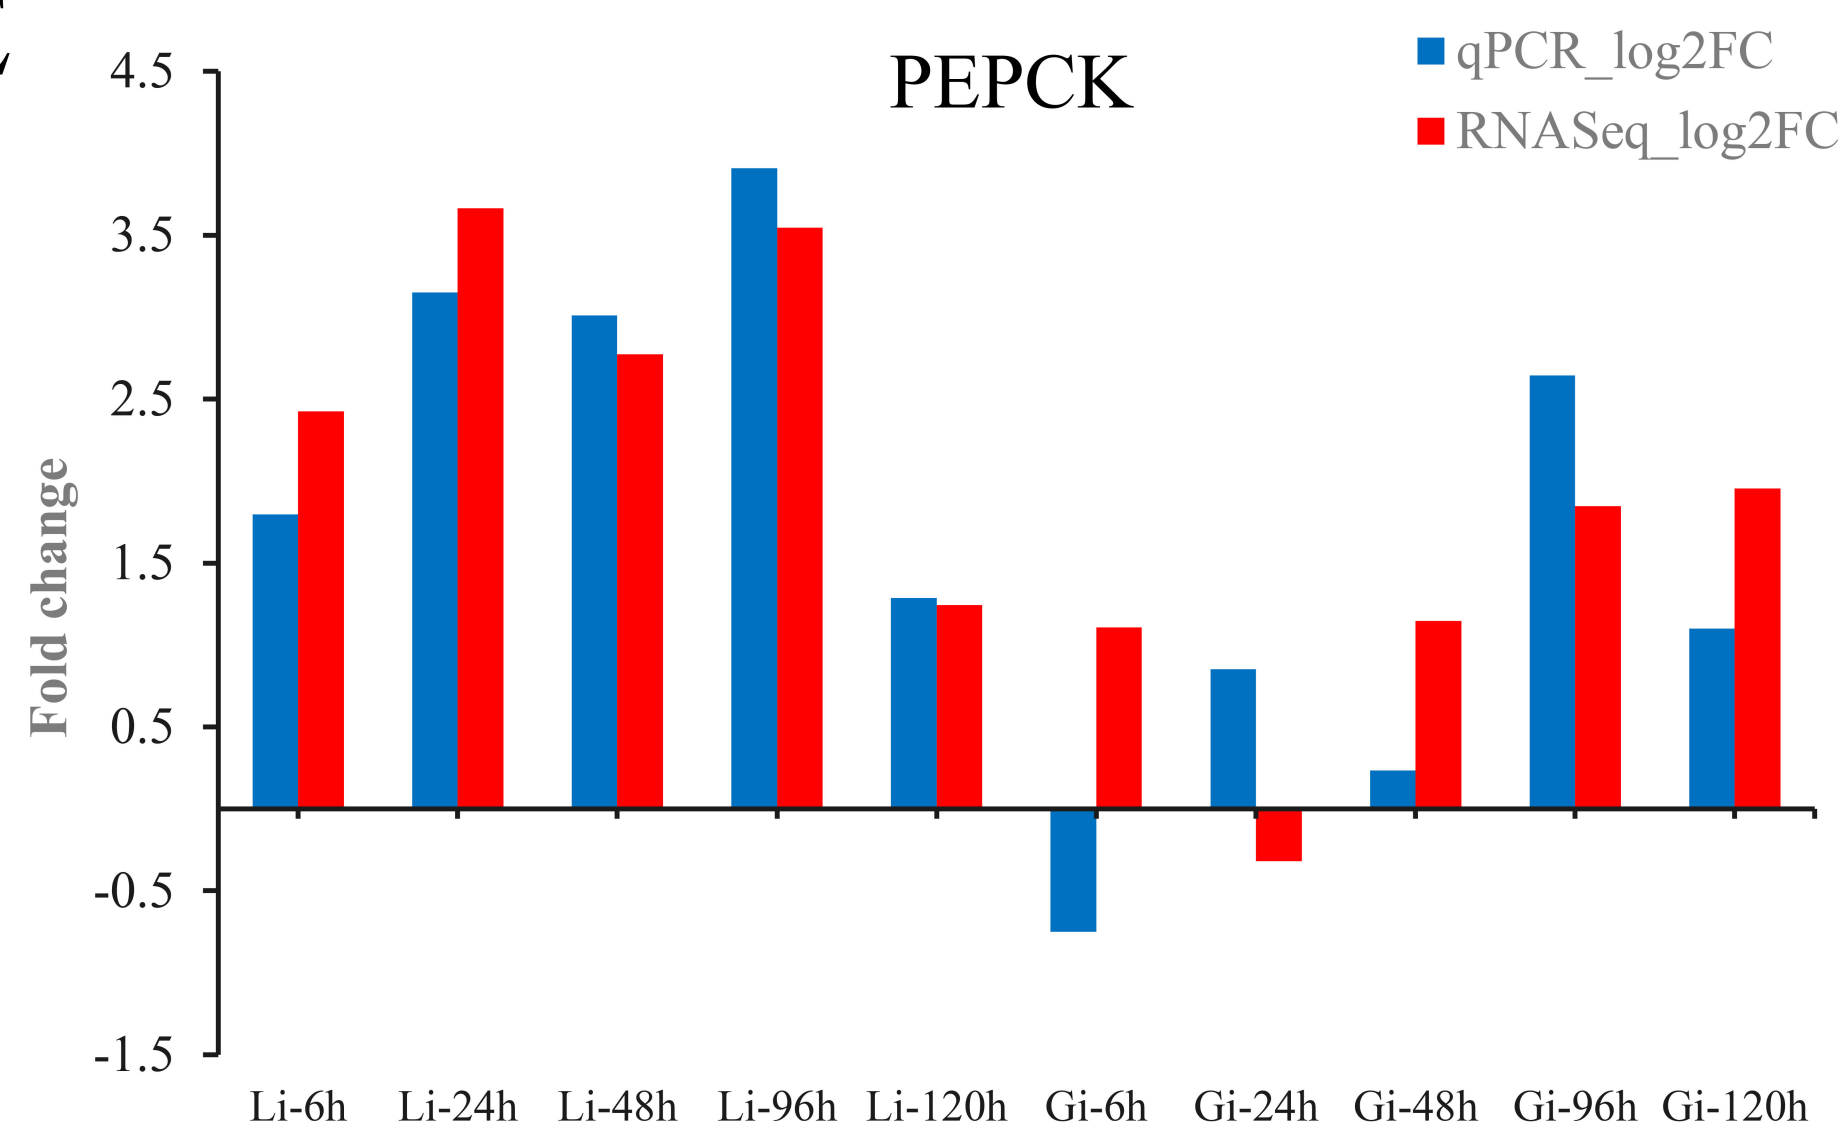

F

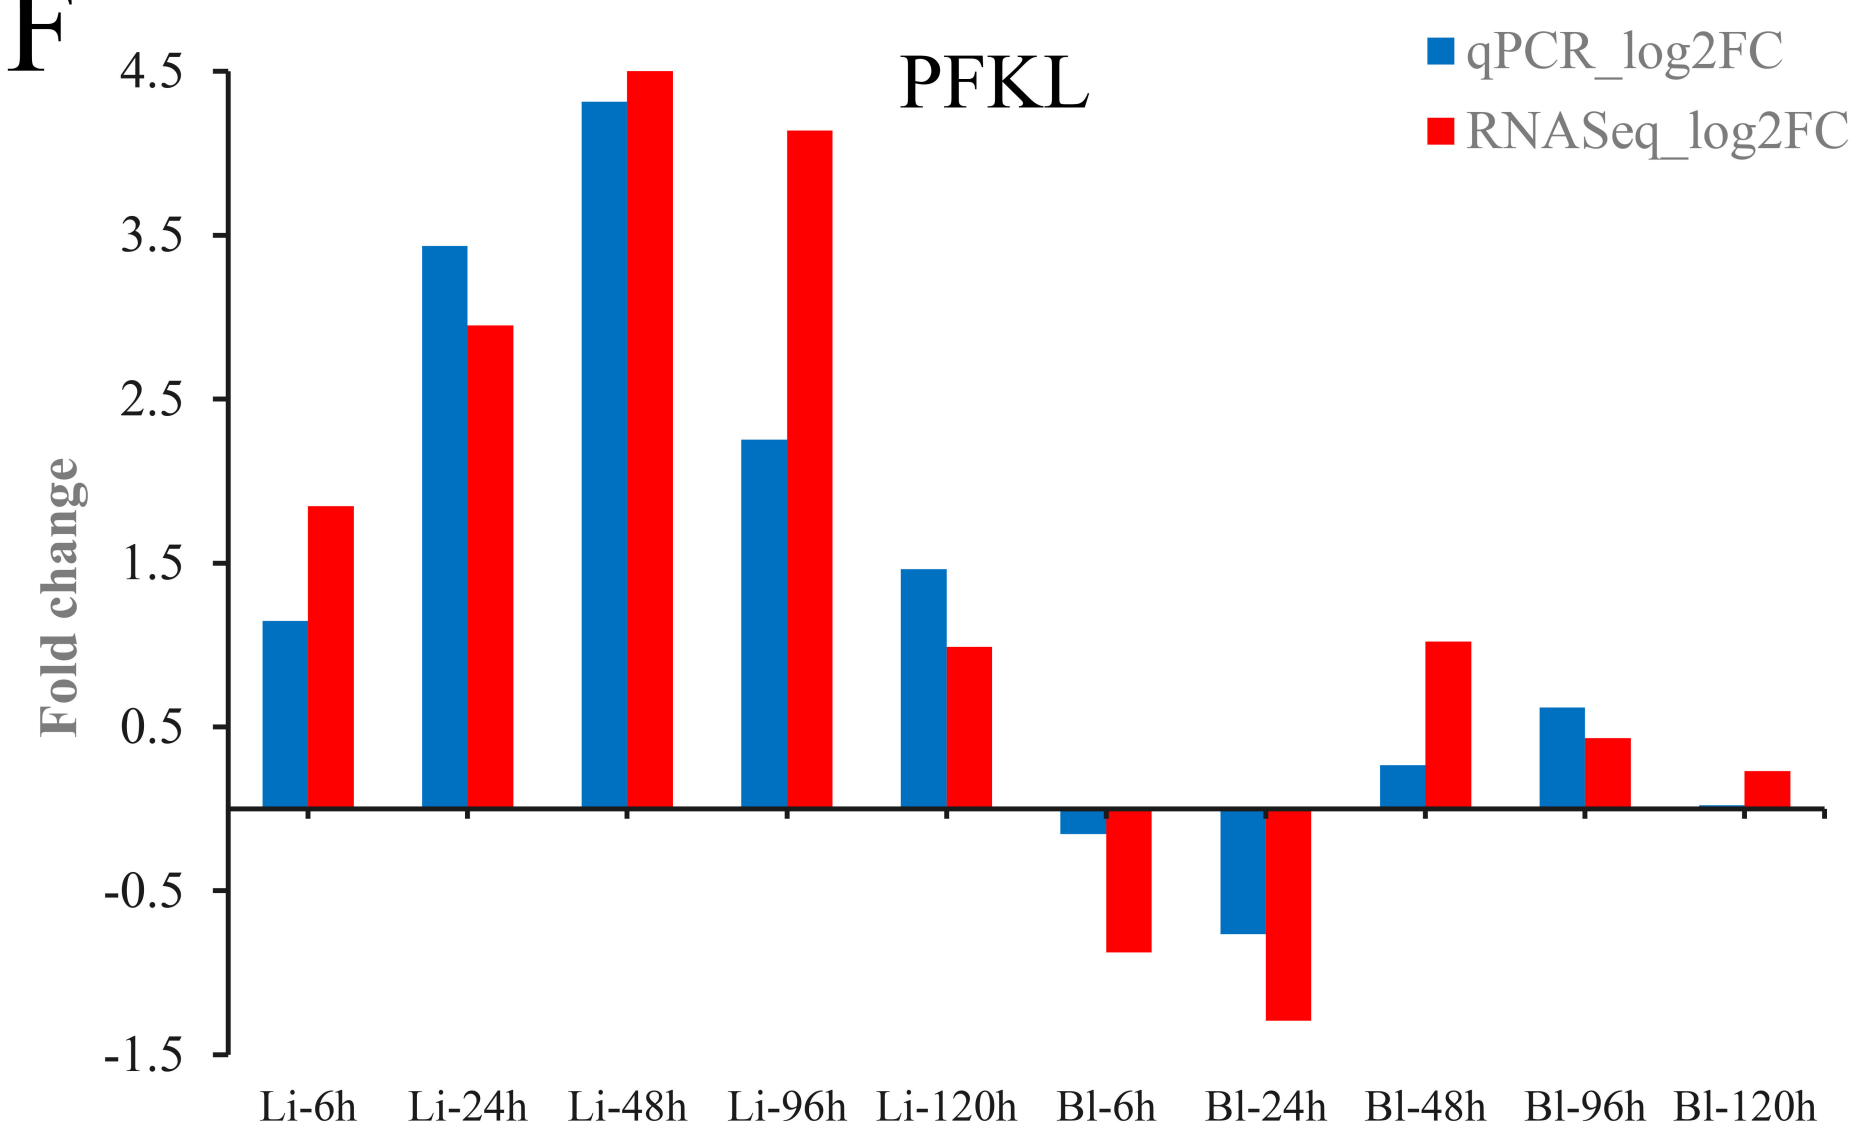

G

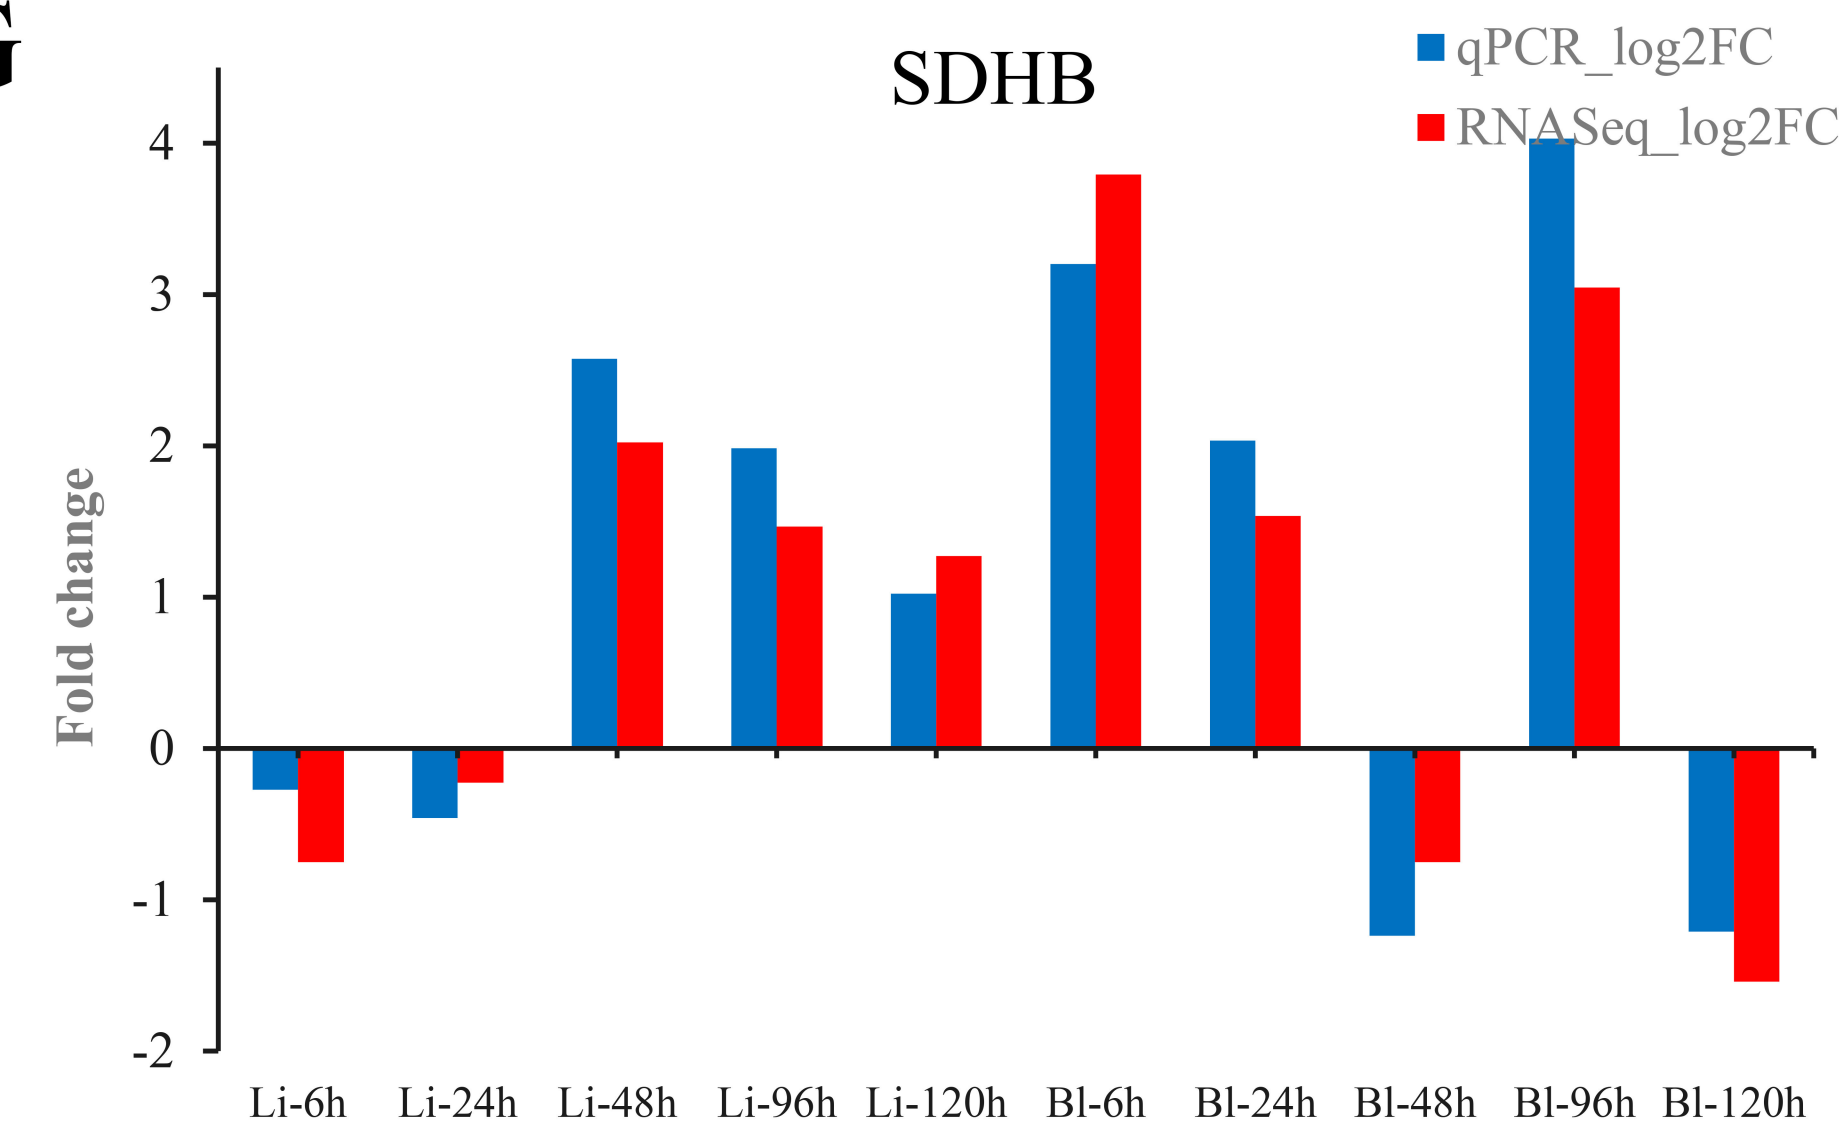

H

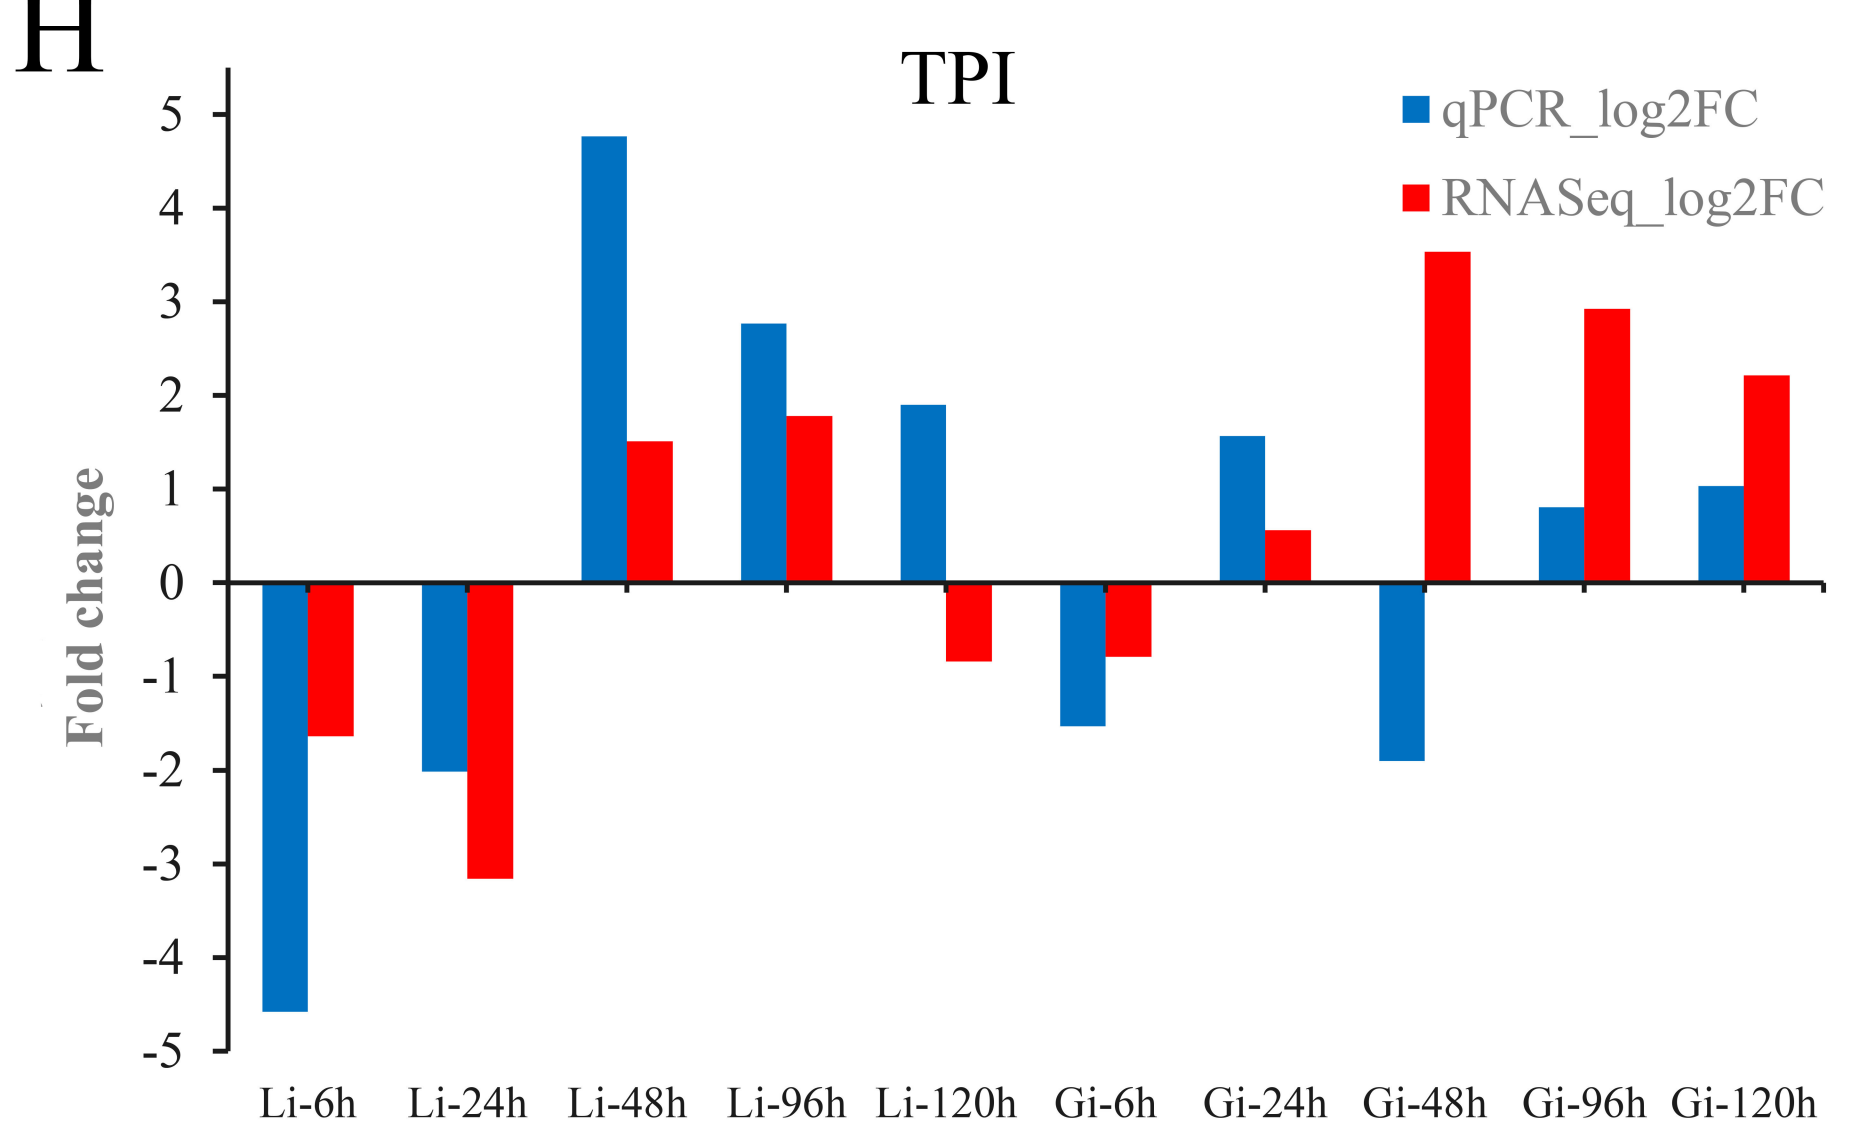

Supplement: s1 [file s1]

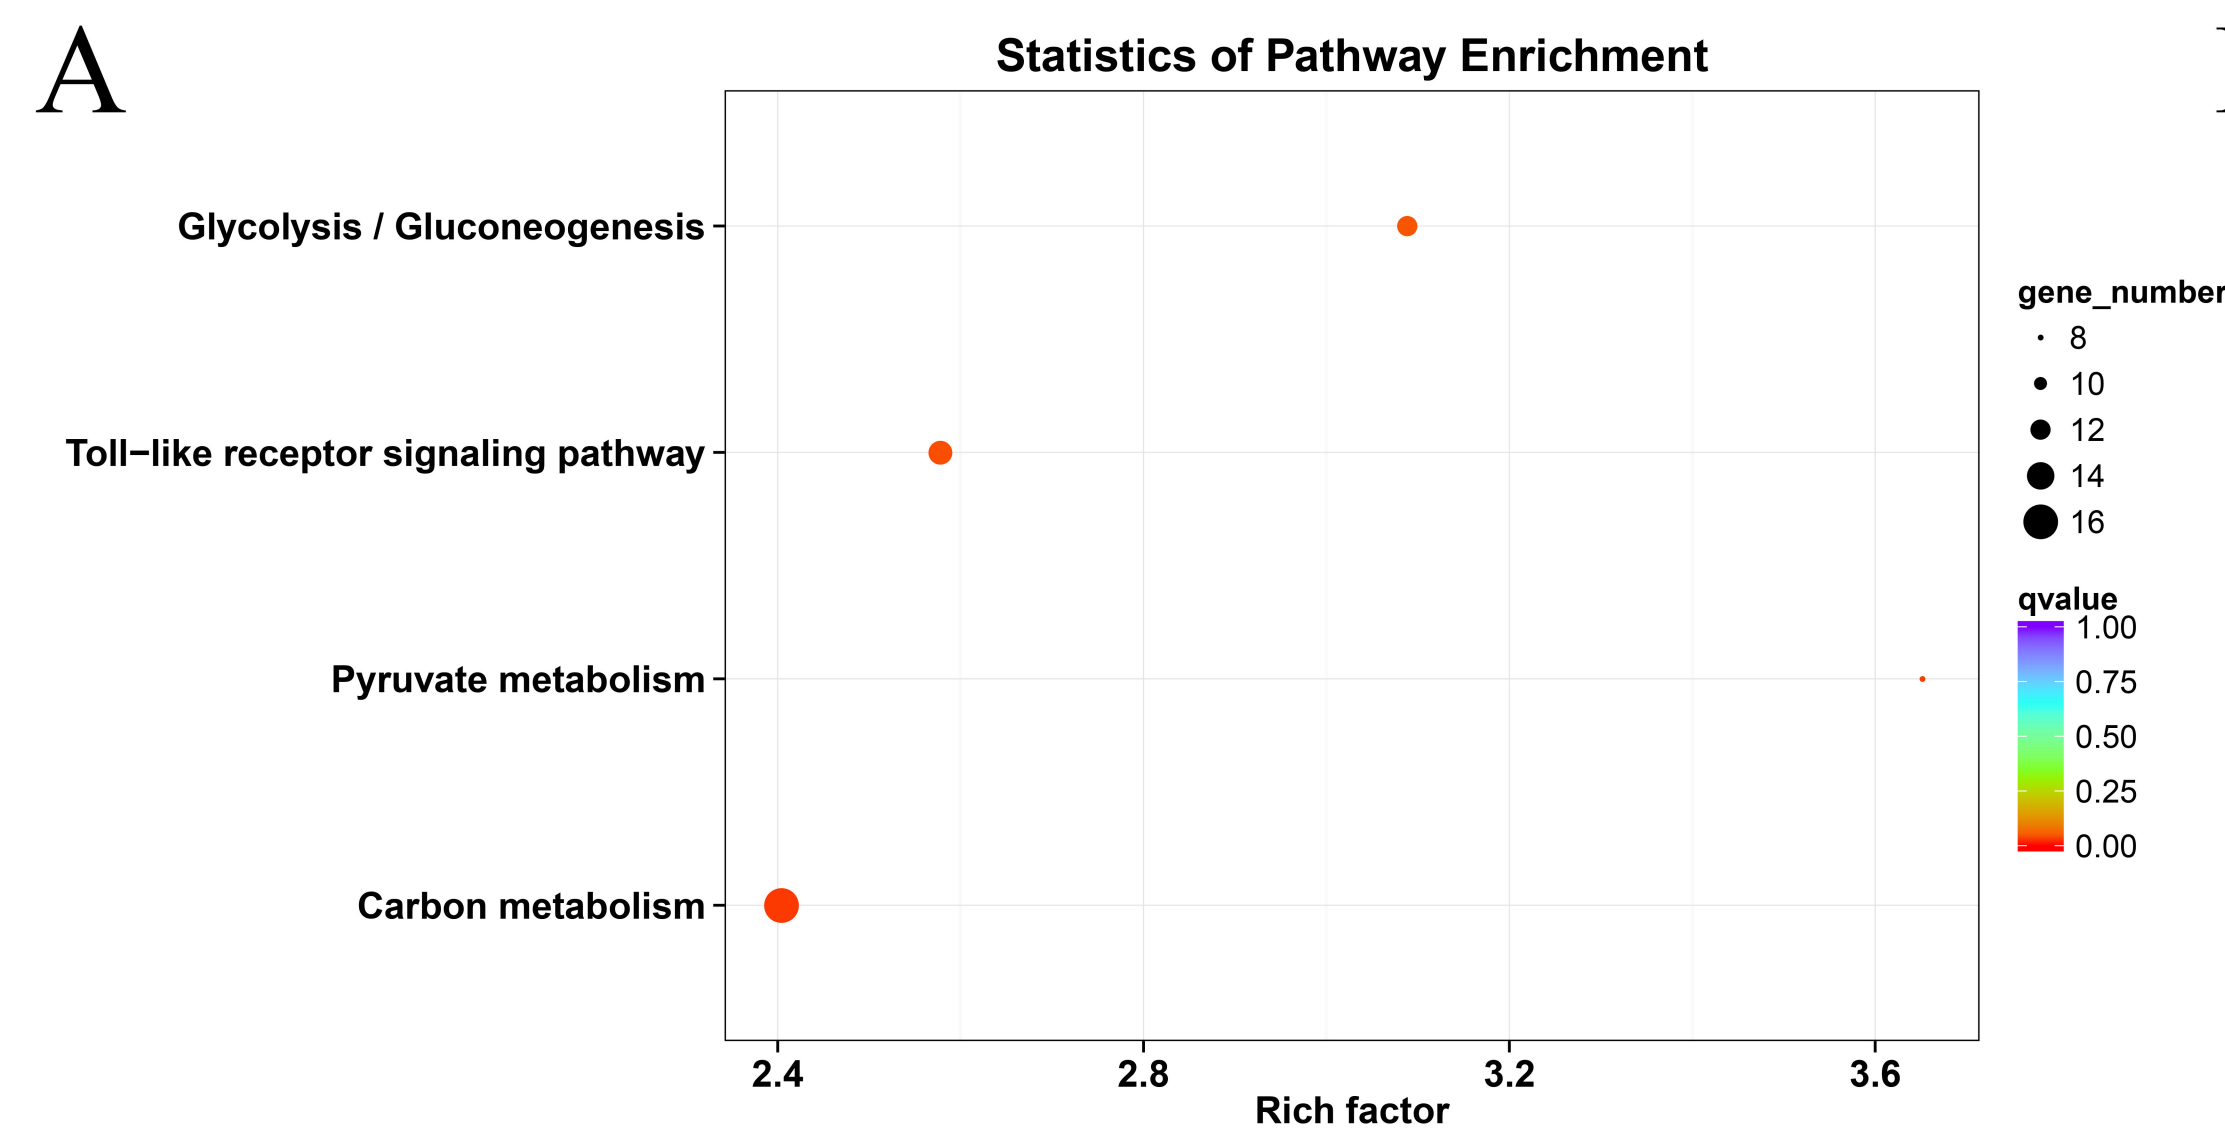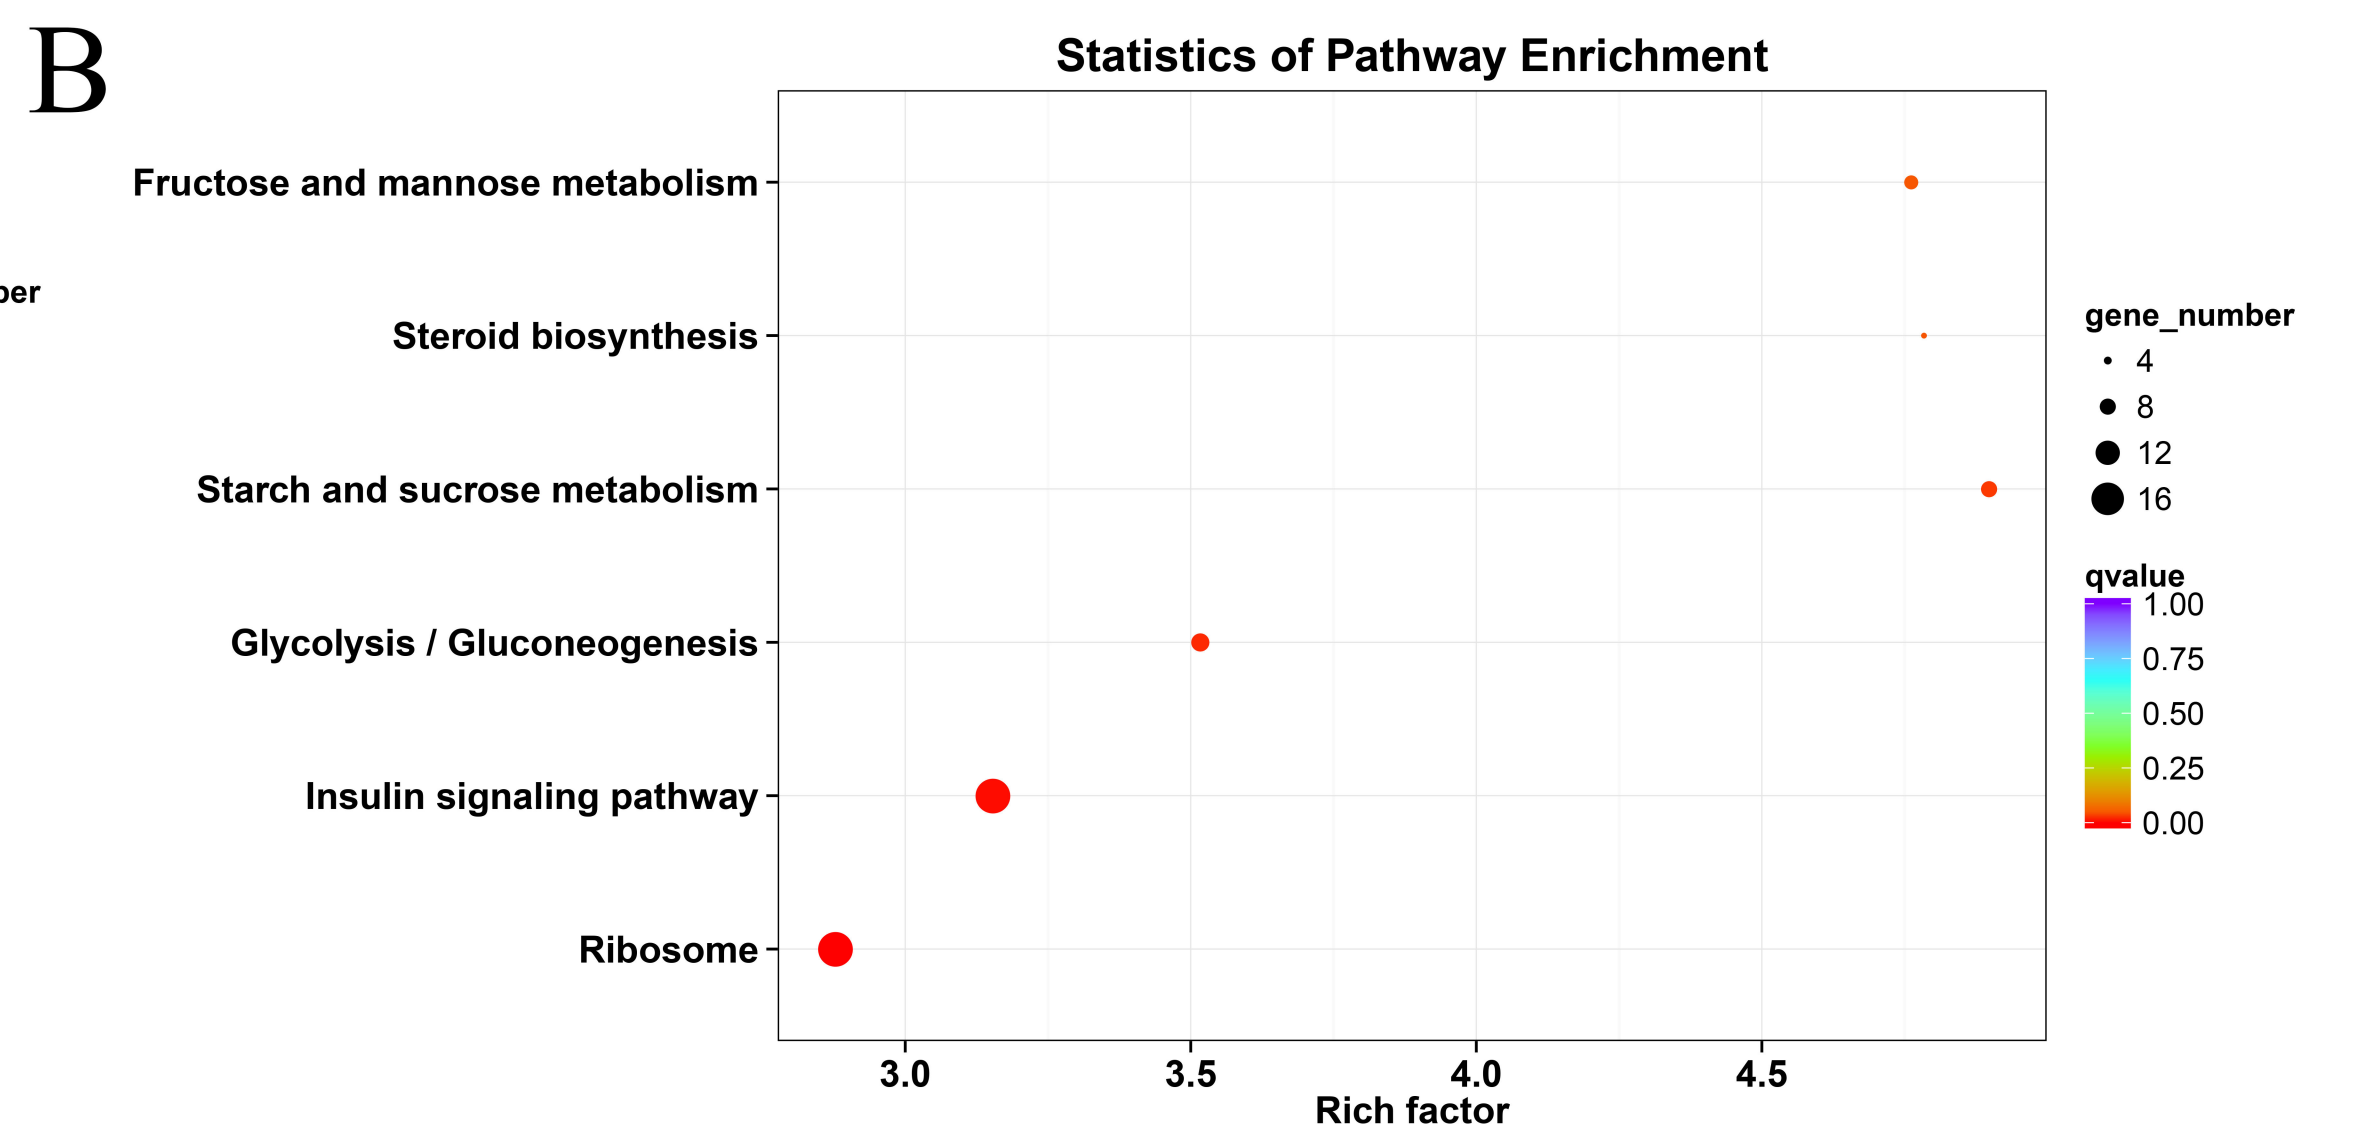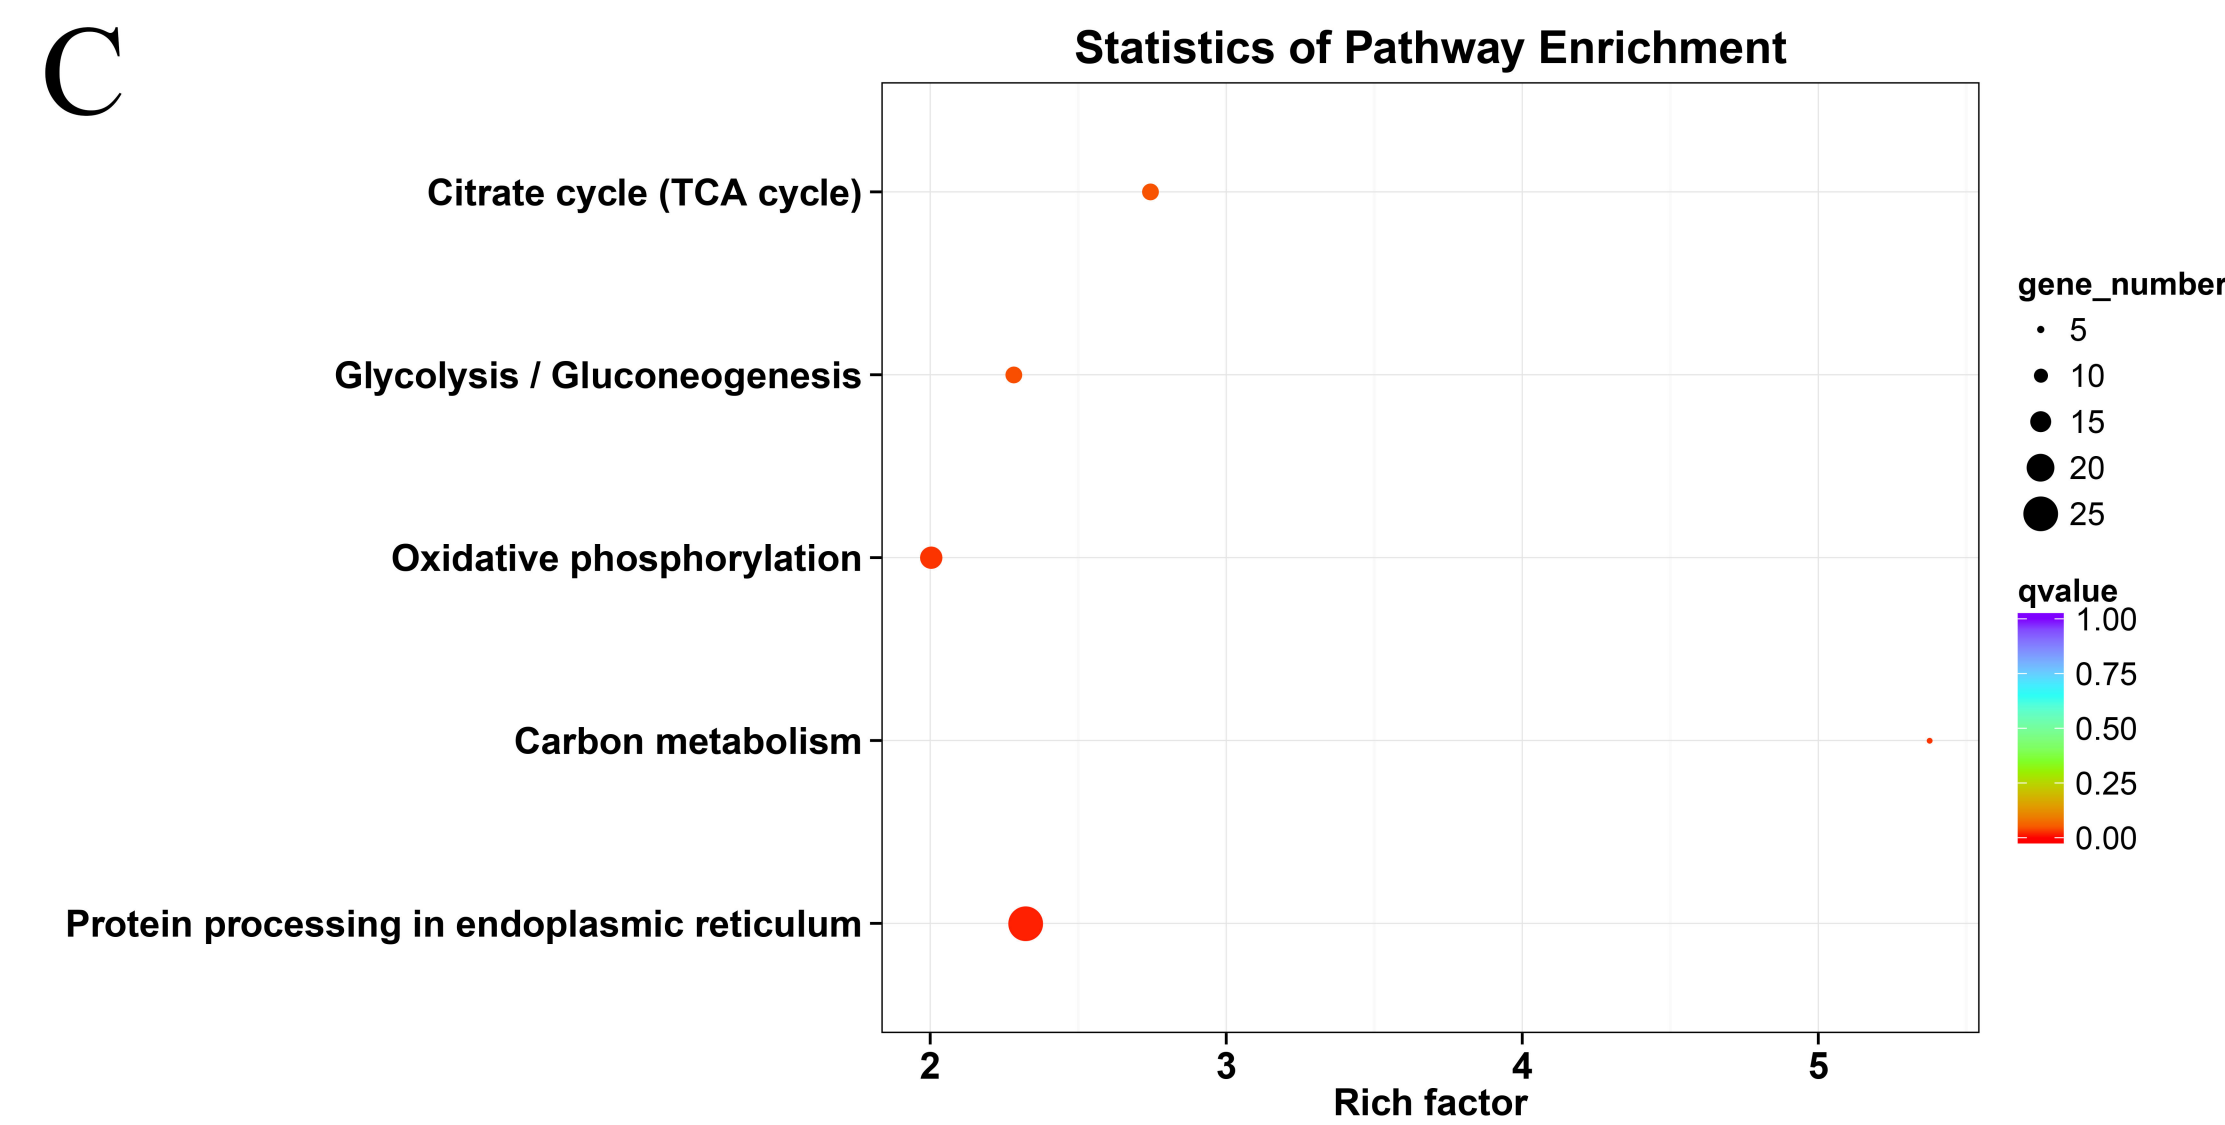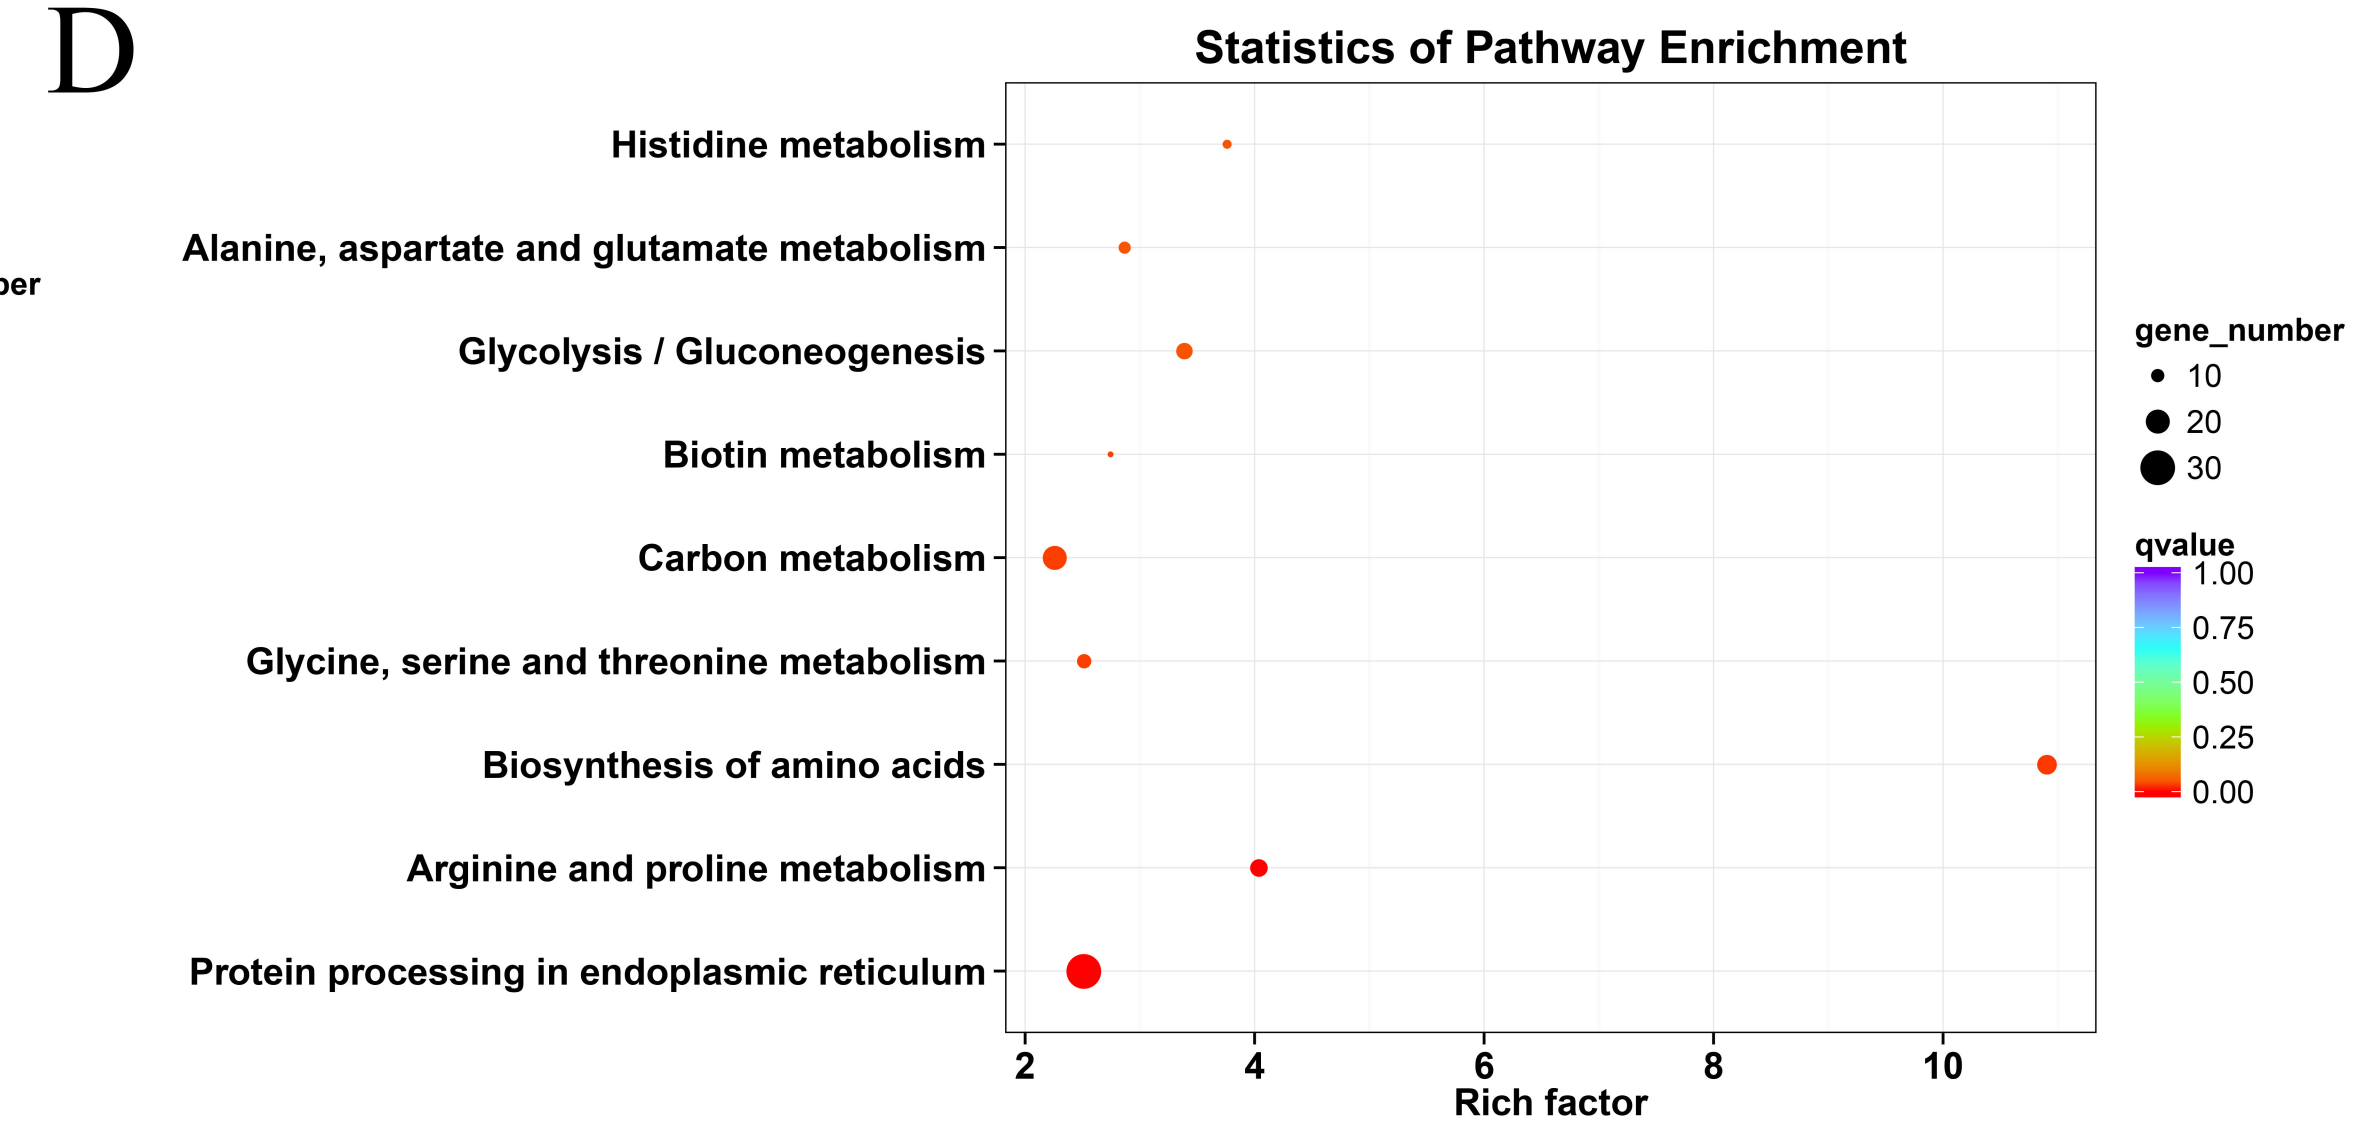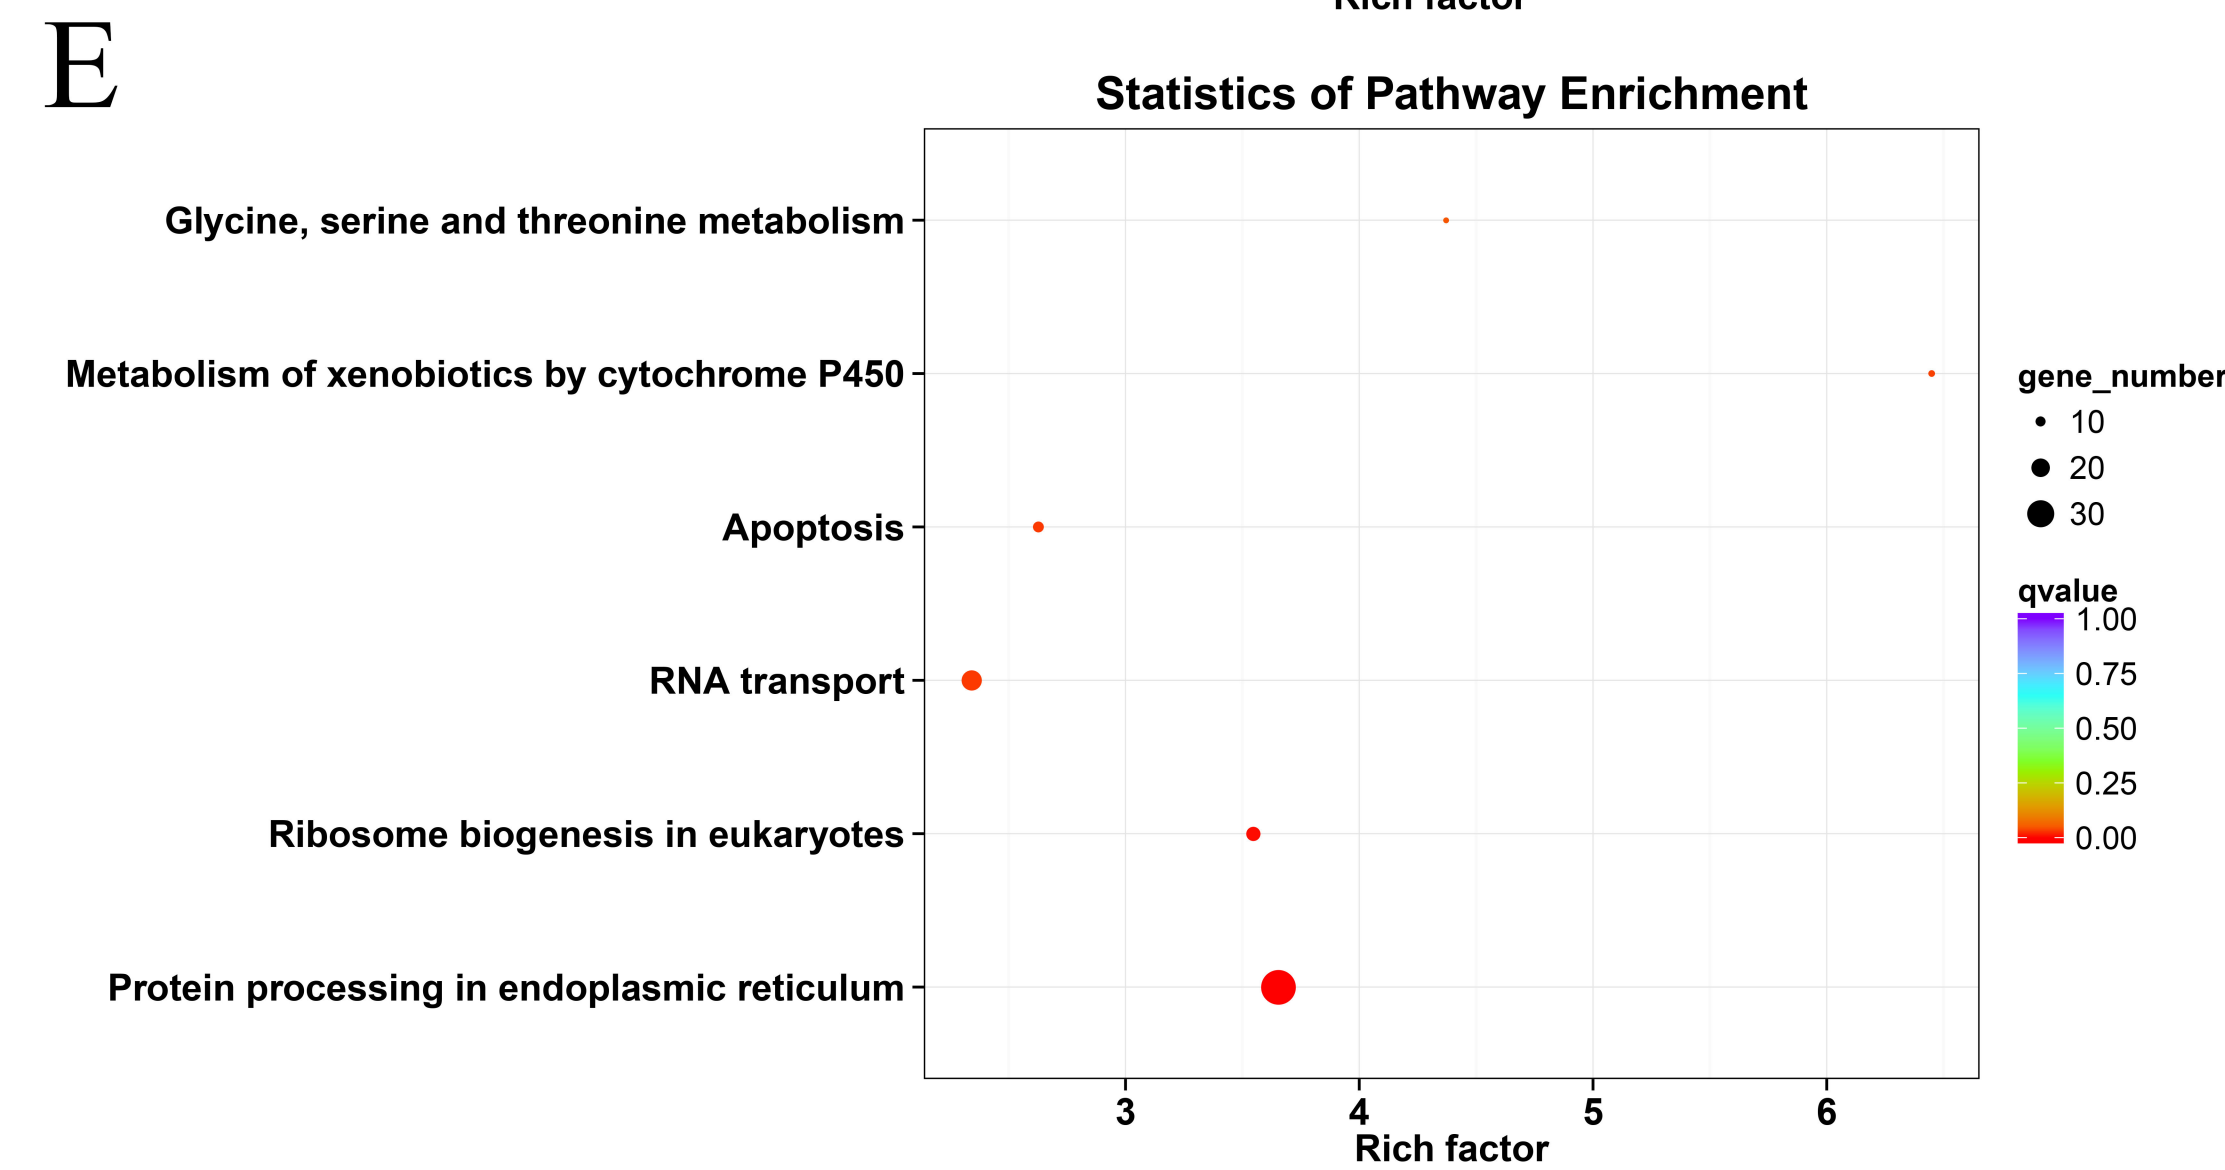

Supplement: s1 [file s1]
